# Supplementary material
Source: publisher figshare collection journal article supplement (https://diabetesjournals.figshare.com/articles/dataset/_/13626674)

Supplementary Fig. 1

A

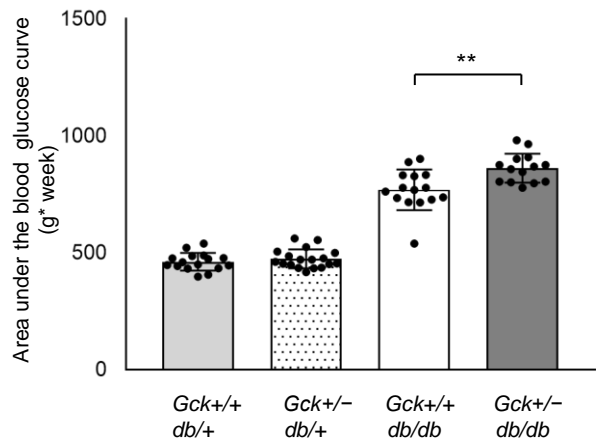

B

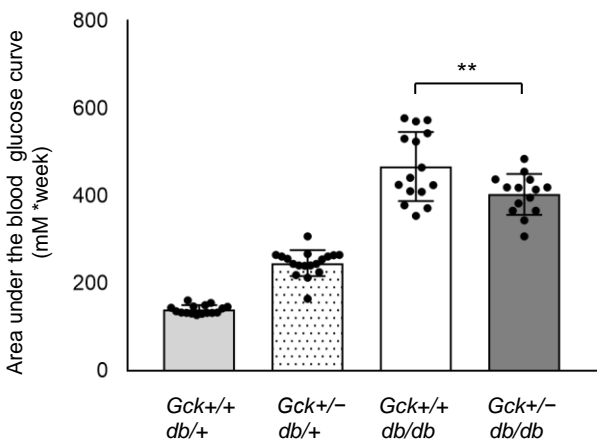

# Supplementary Fig. 2

A

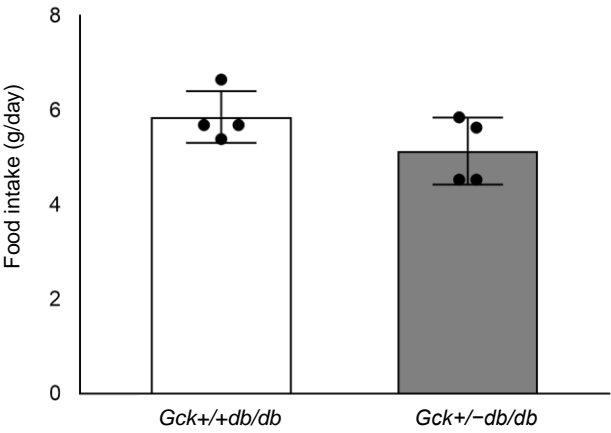

B

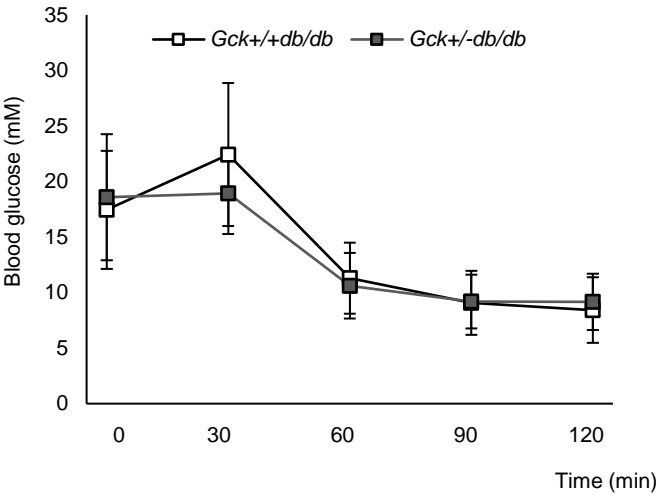

C

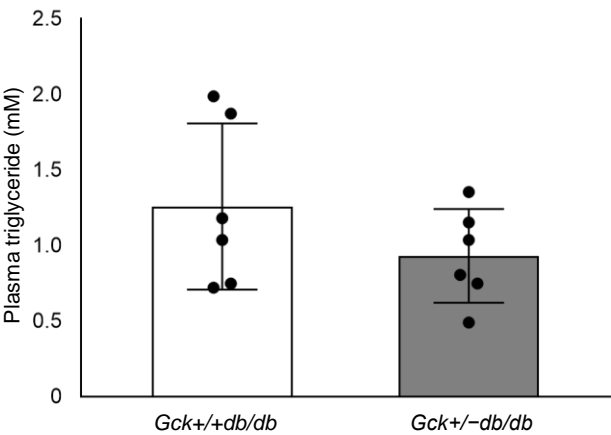

D

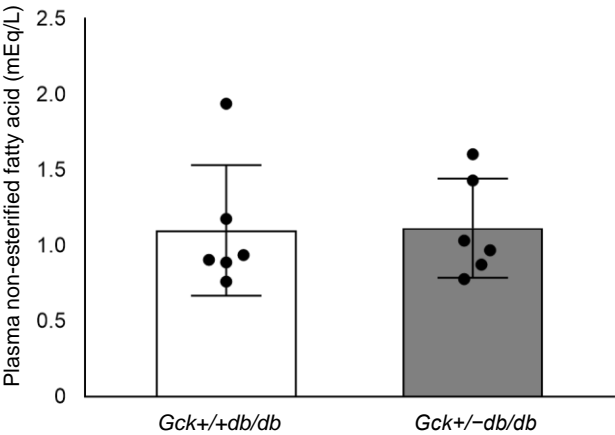

E

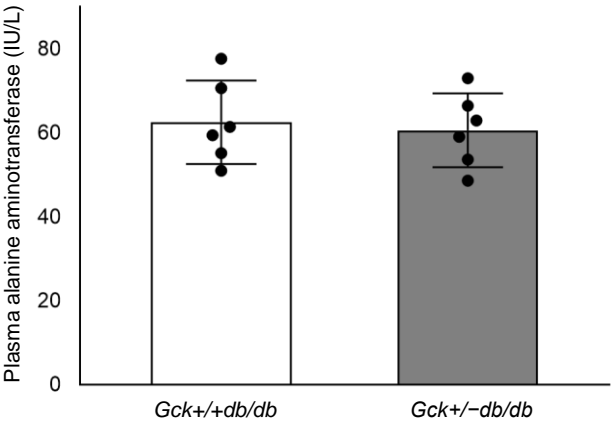

Supplementary Fig. 3

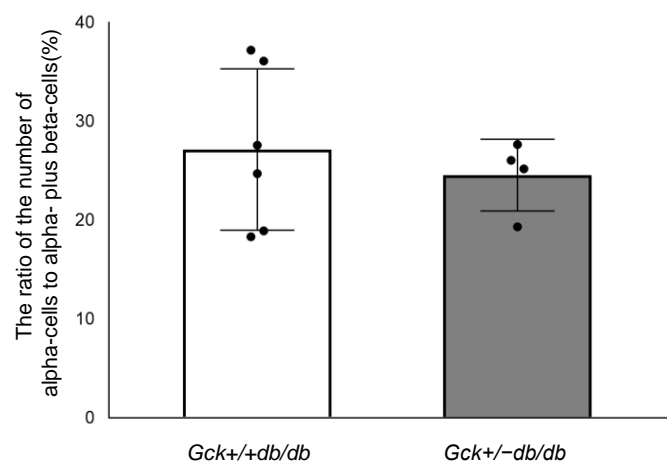

# Supplementary Fig. 4

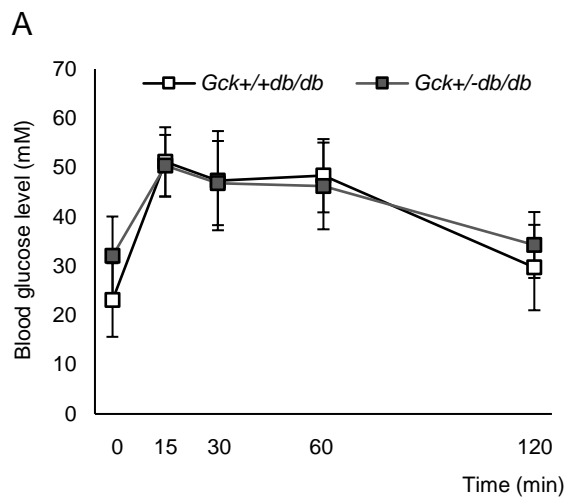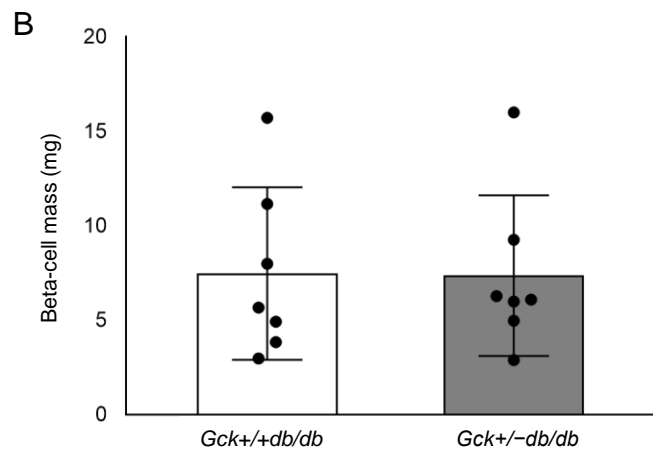

Supplementary Fig. 5

A

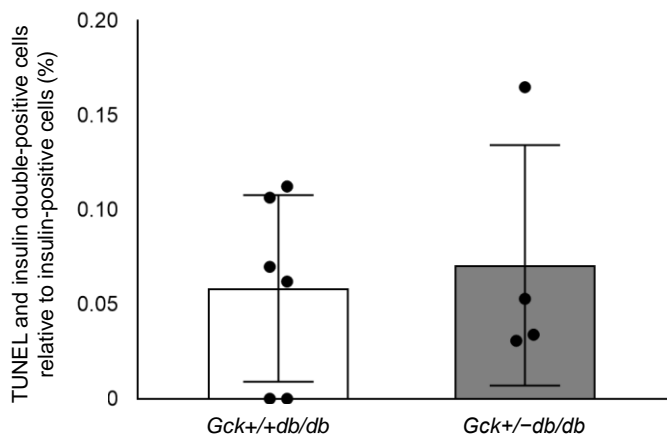

B

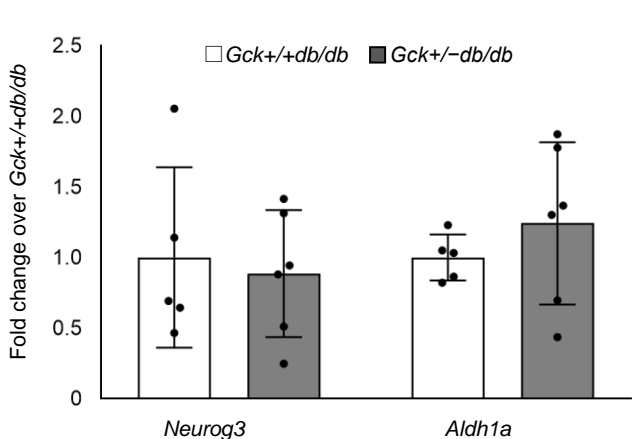

Supplementary Fig. 6

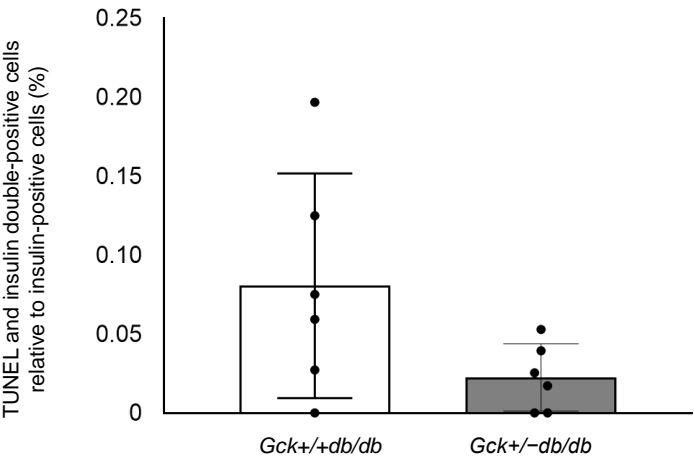

# Supplementary Fig. 7

24w

*Gck*<sup>+/+</sup>*db*<sup>+/+</sup>

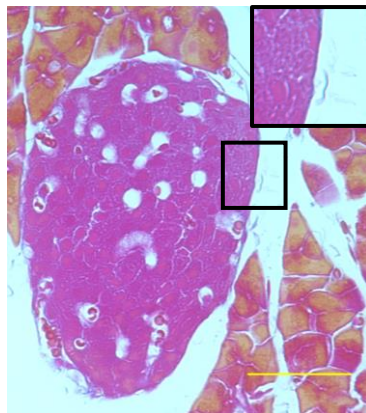

*Gck*<sup>+/-</sup>*db*<sup>+/+</sup>

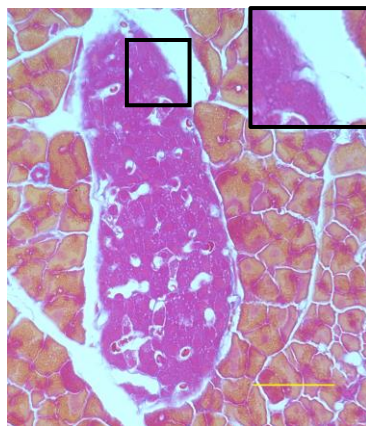

*Gck*<sup>+/+</sup>*db*<sup>db</sup>

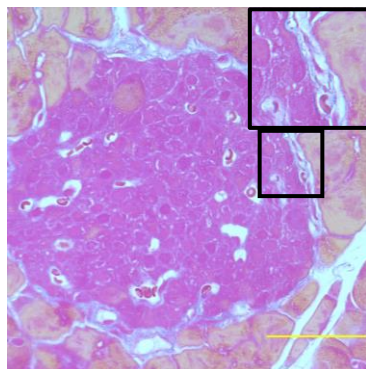

*Gck*<sup>+/-</sup>*db*<sup>db</sup>

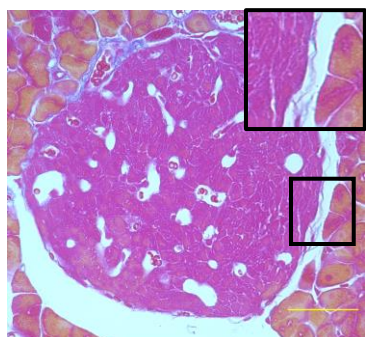

Supplementary Fig. 8

A

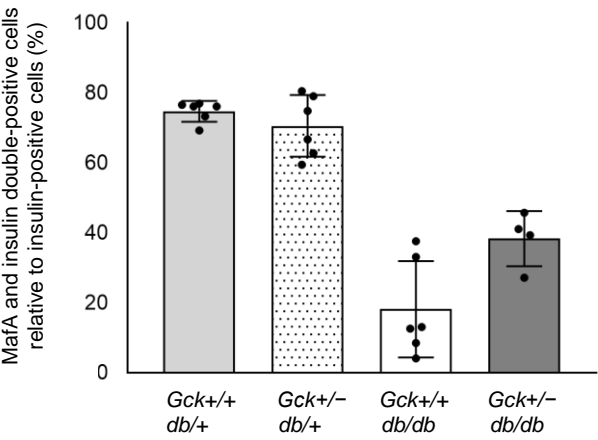

B

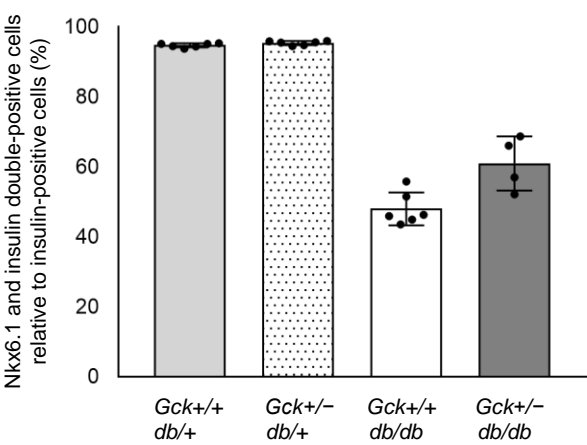



# Supplementary Fig. 9

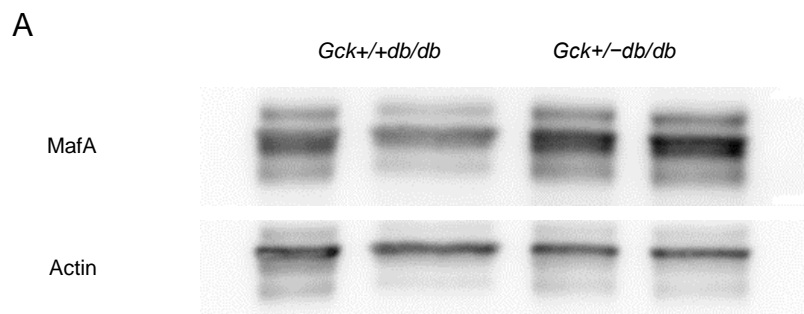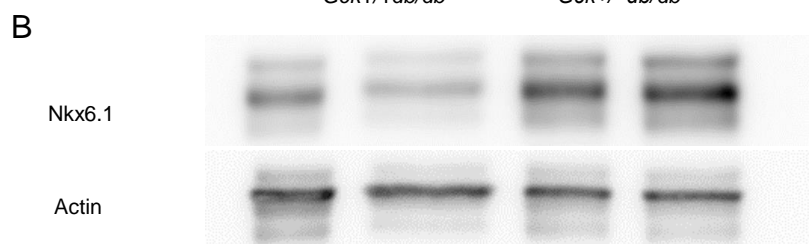

# Supplementary Fig. 10

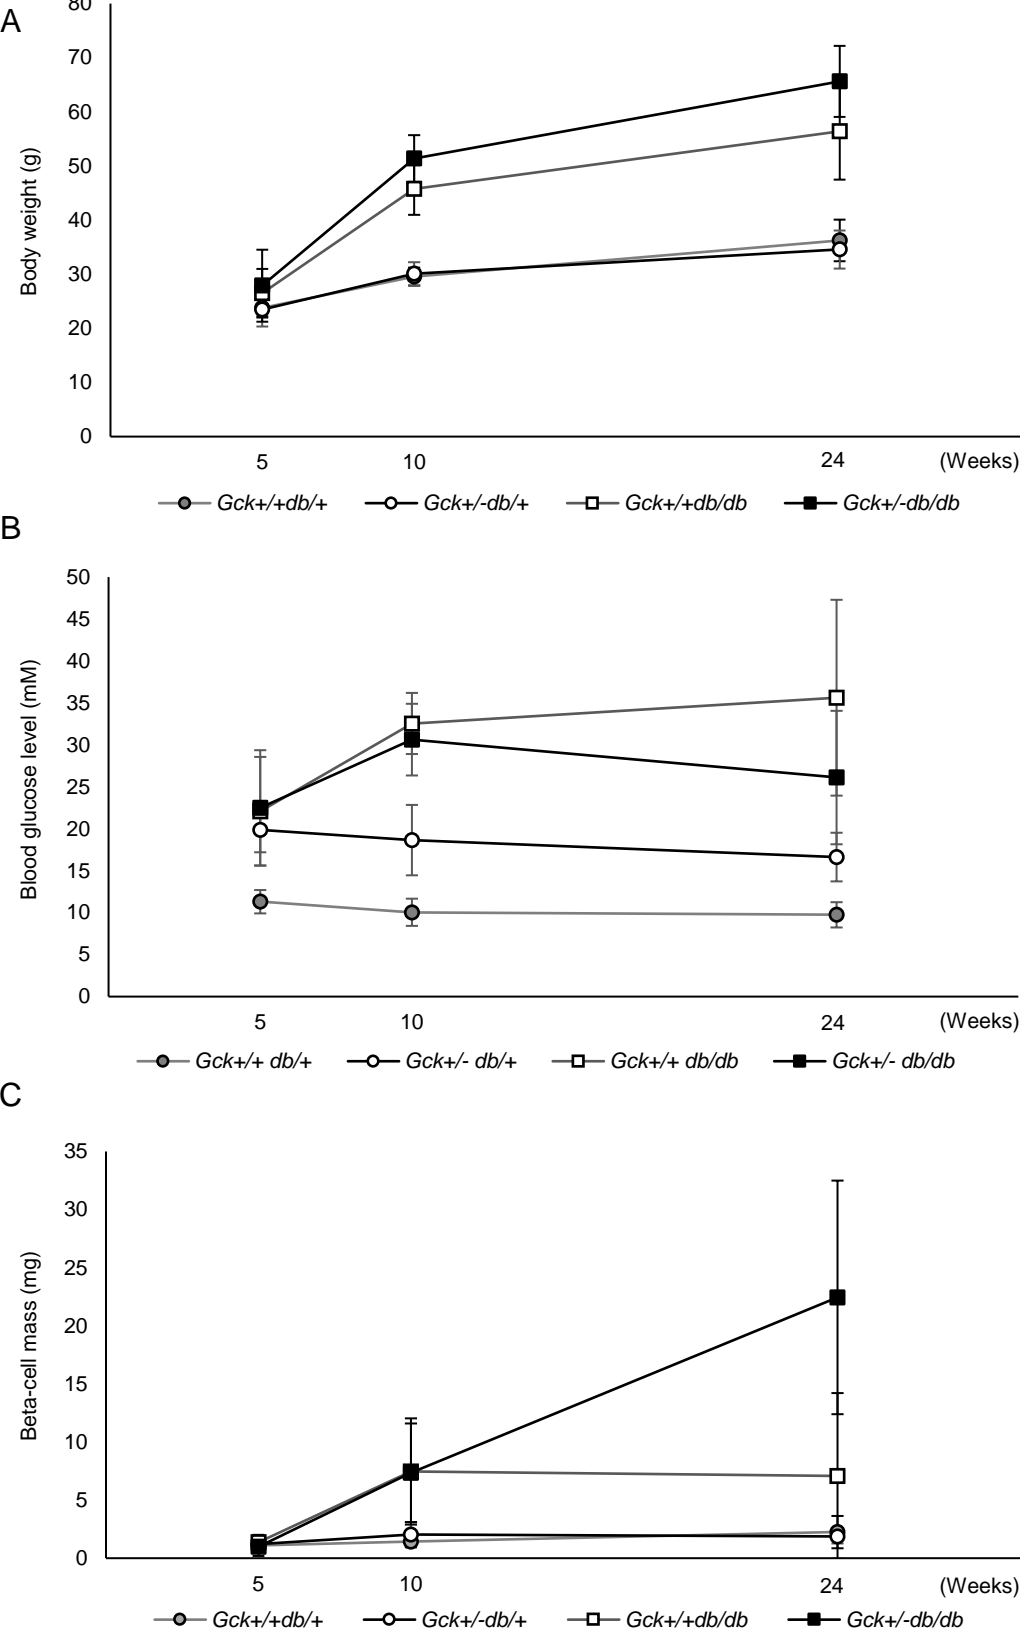

Supplement: Supplementary file 1 [file 1]
