# Supplementary material
Source: publisher figshare collection journal article supplement (https://diabetesjournals.figshare.com/articles/dataset/_/13626674)
Supplement: Supplementary file 2 [file 1]

## Supplemental material

**Supplementary Table 1.** Primary and secondary antibodies used in immunofluorescence

| Primary antibodies   |            |                              |            |                  |
|----------------------|------------|------------------------------|------------|------------------|
| Antigen              | Species    | Manufacturer                 | Catalog#   | Working dilution |
| Insulin              | Rabbit     | Proteintech                  | 15848-1-AP | 1:1000           |
| Insulin              | Rabbit     | Santa Cruz<br>Biotechnology  | H-86       | 1:250            |
| Insulin              | Guinea pig | Dako                         | IR002      | 1:1              |
| Ki67                 | Rabbit     | Cell Signaling<br>Technology | D3B5       | 1:200            |
| MafA                 | Rabbit     | BETHYL                       | IHC-00352  | 1:50             |
| Nkx6.1               | Rabbit     | Cell Signaling<br>Technology | D8O4R      | 1:200            |
| Tom20                | Rabbit     | Cell Signaling<br>Technology | D8T4N      | 1:200            |
| Secondary antibodies |            |                              |            |                  |
| Antigen              | Species    | Fluorescent dye              | Catalog#   | Manufacturer     |

---

|                   |      |                 |        |                   |
|-------------------|------|-----------------|--------|-------------------|
| Guinea pig<br>IgG | Goat | Alexa Fluor 488 | A11073 | Life Technologies |
| Rabbit IgG        | Goat | Alexa Fluor 488 | A11008 | Life Technologies |
| Rabbit IgG        | Goat | Alexa Fluor 594 | A11012 | Life Technologies |

---

**Supplementary Table 2.** The primer sequences used for real-time quantitative PCR

| Gene (Forward/Reverse) | Sequence                  |
|------------------------|---------------------------|
| <i>Gapdh</i> forward   | GGCCCCTCTGGAAAGCTGTGGTGT  |
| <i>Gapdh</i> reverse   | GTTGGGGGCCCAGTTGGGATAGG   |
| <i>Ki67</i> forward    | CTGCCTGCGAAGAGAGCATC      |
| <i>Ki67</i> reverse    | AGCTCCACTTCGCCTTTTGG      |
| <i>Ccna2</i> forward   | TCCTTGCTTTTGACTTGGCT      |
| <i>Ccna2</i> reverse   | ATGACTCAGGCCAGCTCTGT      |
| <i>Ccnb1</i> forward   | TGGCCTCACAAAGCACATGA      |
| <i>Ccnb1</i> reverse   | GCTGTGCCAGCGTGCTAATC      |
| <i>Ccnd1</i> forward   | TAGGCCCTCAGCCTCACTC       |
| <i>Ccnd1</i> reverse   | CCACCCCTGGGATAAAGCAC      |
| <i>Ccnd2</i> forward   | AAGCCTGCCAGGAGCAAA        |
| <i>Ccnd2</i> reverse   | ATCCGGCGTTATGCTGCTCT      |
| <i>Ccnd3</i> forward   | CCAGCGTGTCCTGCAGAGTT      |
| <i>Ccnd3</i> reverse   | CCTTTTGCACGCACTGGAAG      |
| <i>Nkx6.1</i> forward  | CTGCACAGTATGGCCGAGATG     |
| <i>Nkx6.1</i> reverse  | CCGGGTTATGTGAGCCCAA       |
| <i>Mafa</i> forward    | CTTCAGCAAGGAGGAGGTCATC    |
| <i>Mafa</i> reverse    | GCGTAGCCGCGGTTCTT         |
| <i>Pdx1</i> forward    | CTCCGGACATCTCCCCATAC      |
| <i>Pdx1</i> reverse    | ACGGGTCCTCTTGTTTTCCT      |
| <i>Ins1</i> forward    | GACCAGCTATAATCAGAGACC     |
| <i>Ins1</i> reverse    | AGTTGCAGTAGTTCTCCAGCTG    |
| <i>Ins2</i> forward    | AGCCCTAAGTGATCCGCTACAA    |
| <i>Ins2</i> reverse    | AGTTGCAGTAGTTCTCCAGCTG    |
| <i>Neurog3</i> forward | CCAAGAGCGAGTTGGCACT       |
| <i>Neurog3</i> reverse | CGGGCCATAGAAGCTGTGG       |
| <i>Aldh1a</i> forward  | ATCAACAACGACTGGCACGAA     |
| <i>Aldh1a</i> reverse  | CACATCGGGCTTATCTCCTTC     |
| <i>Atf3</i> forward    | CAGACCCCTGGAGATGTCAGT     |
| <i>Atf3</i> reverse    | TTCTTGTTTCGACTTTCCTGGA    |
| <i>Cyba</i> forward    | TGCCAGTGTGATCTATCTGCT     |
| <i>Cyba</i> reverse    | TCGGCTTCTTTCGGACCTCT      |
| <i>Cybb</i> forward    | AGCTATGAGGTGGTGATGTTAGTGG |

|                       |                              |
|-----------------------|------------------------------|
| <i>Cybb</i> reverse   | CACAATATTTGTACCAGACAGACTTGAG |
| <i>Ncf1</i> forward   | ACACCTTCATTGCGCCATATTGC      |
| <i>Ncf1</i> reverse   | CCTGCCACTTAACCAGGAACA        |
| <i>Chop</i> forward   | CACCACACCTGAAAGCAGAA         |
| <i>Chop</i> reverse   | GGTGAAAGGCAGGGACTCA          |
| <i>Casp3</i> forward  | ATGGAGAACAACAAAACCTCAGT      |
| <i>Casp3</i> reverse  | TTGCTCCCATGTATGGTCTTTAC      |
| <i>Pcx</i> forward    | CTGAAGTTCCAAACAGTTCGAGG      |
| <i>Pcx</i> reverse    | CGCACGAAACACTCGGATG          |
| <i>Aldob</i> forward  | CATTGCCAGCATCTGTCAGC         |
| <i>Aldob</i> reverse  | TCATGGTCTCCGTCAGGAA          |
| <i>Pfkfb3</i> forward | AGAACTTCCACTCTCCCACCC        |
| <i>Pfkfb3</i> reverse | AGGGTAGTGCCCATTTGTTGAA       |

---

**Supplementary Table 3.** The expression levels of genes that were derived from the pathway analysis

Ratio>1.5

| PathwayName                                     | Gene Symbol   | Average value<br>(test: <i>Gck</i> <sup>+/-</sup> db/db) | Average value<br>(control: <i>Gck</i> <sup>+/+</sup> db/db) | Ratio<br>(test/control) | P-value     |
|-------------------------------------------------|---------------|----------------------------------------------------------|-------------------------------------------------------------|-------------------------|-------------|
| Mm_Amino_Acid_metabolism_WP662_71177            | <i>Hnmt</i>   | 347.632125                                               | 152.2555333                                                 | 2.283215049             | 0.033691103 |
|                                                 | <i>Hadh</i>   | 78763.6                                                  | 34672.5                                                     | 2.271644675             | 0.00014307  |
|                                                 | <i>Hibadh</i> | 6141.03625                                               | 3812.089333                                                 | 1.61093713              | 0.001269935 |
|                                                 | <i>Ddc</i>    | 19383.9175                                               | 12433.97333                                                 | 1.558947971             | 5.68E-06    |
|                                                 | <i>Pycr1</i>  | 9032.9185                                                | 5095.820333                                                 | 1.772613222             | 8.26E-06    |
|                                                 | <i>Auh</i>    | 2639.04675                                               | 1489.584333                                                 | 1.771666559             | 0.001263633 |
|                                                 | <i>Mut</i>    | 1815.274                                                 | 1100.152767                                                 | 1.650019938             | 0.032195054 |
|                                                 | <i>Pcx</i>    | 198.300625                                               | 75.55101333                                                 | 2.624724888             | 0.007169447 |
| Mm_GPCRs_Class_B_Secretin-like_WP456_69131      | <i>Adgrl3</i> | 304.4685                                                 | 184.0100667                                                 | 1.654629584             | 0.035386165 |
|                                                 | <i>Gipr</i>   | 988.566125                                               | 552.5489333                                                 | 1.789101499             | 0.019487163 |
|                                                 | <i>Glp1r</i>  | 151594.3                                                 | 81222.03333                                                 | 1.866418431             | 0.002077917 |
| Mm_Ptfla_related_regulatory_pathway_WP201_69113 | <i>Pdx1</i>   | 889.402875                                               | 477.7243                                                    | 1.861749287             | 0.010752779 |
|                                                 | <i>Nkx6-1</i> | 4710.87225                                               | 2027.207333                                                 | 2.323823603             | 0.000846666 |
| Mm_G1_to_S_cell_cycle_control_WP413_84705       | <i>E2f1</i>   | 137.998295                                               | 77.32614667                                                 | 1.784626558             | 0.042186002 |
|                                                 | <i>Ccnd2</i>  | 21602.7125                                               | 13166.48333                                                 | 1.640735187             | 0.029020869 |
|                                                 | <i>Cdc45</i>  | 131.001925                                               | 53.31039                                                    | 2.457343212             | 0.030840887 |
|                                                 | <i>Cdkn1a</i> | 2763.967                                                 | 993.9763667                                                 | 2.78071702              | 0.002967721 |
| Mm_G_Protein_Signaling_Pathways_WP232_89955     | <i>Pde7a</i>  | 291.9717                                                 | 188.6763667                                                 | 1.547473619             | 0.021738645 |

|                                               |                |            |             |             |             |
|-----------------------------------------------|----------------|------------|-------------|-------------|-------------|
|                                               | <i>Pde4b</i>   | 3889.847   | 2521.726667 | 1.542533158 | 0.046963153 |
|                                               | <i>Gng12</i>   | 90266.3125 | 55975.44667 | 1.612605488 | 0.025064981 |
|                                               | <i>Akap13</i>  | 478.29825  | 288.5759667 | 1.657443118 | 0.024128225 |
|                                               | <i>Akap5</i>   | 20.6755775 | 13.68572    | 1.51074094  | 0.001626769 |
| Mm_Non-odorant_GPCRs_WP1396_69993             | <i>Adgrb3</i>  | 1191.78975 | 706.4209667 | 1.687081508 | 0.007799991 |
|                                               | <i>P2ry1</i>   | 6651.711   | 3256.601667 | 2.04253135  | 0.000890103 |
|                                               | <i>Gabbr2</i>  | 9370.19725 | 5152.217    | 1.818672865 | 0.023692258 |
|                                               | <i>Adgrl3</i>  | 304.4685   | 184.0100667 | 1.654629584 | 0.035386165 |
|                                               | <i>Gipr</i>    | 988.566125 | 552.5489333 | 1.789101499 | 0.019487163 |
|                                               | <i>Ackr2</i>   | 60.84691   | 28.91527    | 2.104317546 | 0.002327293 |
|                                               | <i>Sstr3</i>   | 9617.47325 | 5262.054    | 1.82770326  | 0.032049576 |
|                                               | <i>Glp1r</i>   | 151594.3   | 81222.03333 | 1.866418431 | 0.002077917 |
|                                               | <i>Mc5r</i>    | 17.22025   | 9.63859     | 1.786594305 | 0.010042421 |
|                                               | <i>Adra2a</i>  | 3420.55575 | 1672.067    | 2.045704957 | 0.004504519 |
| Mm_Metapathway_biotransformation_WP1251_69747 | <i>Hnmt</i>    | 347.632125 | 152.2555333 | 2.283215049 | 0.033691103 |
|                                               | <i>Akr1b10</i> | 618.694475 | 331.1804667 | 1.868149052 | 0.001908686 |
|                                               | <i>Chst11</i>  | 4333.1485  | 2833.848333 | 1.529068599 | 0.012752632 |
|                                               | <i>Gal3st1</i> | 256.4241   | 160.1561667 | 1.601087897 | 0.004776445 |
|                                               | <i>Gpx2</i>    | 492.436075 | 247.419     | 1.990292075 | 0.00502907  |
|                                               | <i>Hs3st6</i>  | 235.5686   | 88.11595667 | 2.673393207 | 0.002099471 |

Ratio<0.67

| PathwayName                                   | Gene<br>Symbol | Average value<br>(test:<br><i>Gck<sup>+/-</sup> db/db</i> ) | Average value<br>(control:<br><i>Gck<sup>+/+</sup> db/db</i> ) | Ratio<br>(test/control) | P-value     |
|-----------------------------------------------|----------------|-------------------------------------------------------------|----------------------------------------------------------------|-------------------------|-------------|
| Mm_Cytoplasmic_Ribosomal_Proteins_WP163_78425 | <i>Rpl37a</i>  | 2139.58675                                                  | 3298.377667                                                    | 0.648678522             | 0.041030326 |
|                                               | <i>Rpl7</i>    | 15691.635                                                   | 27774.49667                                                    | 0.564965594             | 0.001271937 |
|                                               | <i>Rpl7a</i>   | 5401.72275                                                  | 8333.442                                                       | 0.648198277             | 0.002193117 |
|                                               | <i>Rpl35</i>   | 18785.615                                                   | 29824.13                                                       | 0.629879732             | 0.006999332 |
|                                               | <i>Rps3a1</i>  | 7601.53075                                                  | 13726.52333                                                    | 0.553784128             | 0.001198088 |
|                                               | <i>Rpl34</i>   | 11655.78                                                    | 19427.68333                                                    | 0.599957277             | 0.000965261 |
|                                               | <i>Rps20</i>   | 5238.35425                                                  | 9910.484667                                                    | 0.528566909             | 0.001344429 |
|                                               | <i>Rps8</i>    | 32415.0025                                                  | 50708.32667                                                    | 0.639244176             | 0.006245172 |
|                                               | <i>Rpl9</i>    | 9029.38925                                                  | 15624.08667                                                    | 0.577914693             | 0.000998786 |
|                                               | <i>Rpl37rt</i> | 4908.989                                                    | 7757.416                                                       | 0.632812395             | 0.038993619 |
|                                               | <i>Rps5</i>    | 834.554425                                                  | 1412.028333                                                    | 0.591032351             | 0.007701656 |
|                                               | <i>Rps19</i>   | 860.29375                                                   | 1692.115667                                                    | 0.508413087             | 0.034261181 |
|                                               | <i>Rps16</i>   | 3658.11025                                                  | 5601.506333                                                    | 0.653058308             | 0.020218778 |
|                                               | <i>Rpl27a</i>  | 699.01585                                                   | 1084.2073                                                      | 0.644725275             | 0.043752632 |
|                                               | <i>Rplp2</i>   | 5474.607                                                    | 9044.800333                                                    | 0.605276711             | 0.002068296 |
|                                               | <i>Rps11</i>   | 11292.276                                                   | 18465.84333                                                    | 0.611522355             | 0.010928454 |
|                                               | <i>Rps13</i>   | 2662.765                                                    | 4445.625667                                                    | 0.598962936             | 0.02350522  |
|                                               | <i>Rps15a</i>  | 2396.2435                                                   | 4705.18                                                        | 0.509277753             | 0.004984506 |
|                                               | <i>Rpl13</i>   | 1047.1354                                                   | 1840.193                                                       | 0.569035639             | 0.003348844 |

|                              |               |            |             |             |             |
|------------------------------|---------------|------------|-------------|-------------|-------------|
|                              | <i>Rps25</i>  | 9728.64475 | 14587.56    | 0.666913778 | 0.005115276 |
|                              | <i>Rpl36a</i> | 2430.02375 | 4613.496333 | 0.526720642 | 0.001472341 |
|                              | <i>Rpl39</i>  | 6793.6915  | 10362.129   | 0.655626995 | 0.032896507 |
|                              | <i>Rps4x</i>  | 3758.1055  | 6999.447333 | 0.536914605 | 0.007735063 |
|                              | <i>Rps12</i>  | 19251.8525 | 30788.40333 | 0.625295579 | 0.007490412 |
|                              | <i>Rpl26</i>  | 27343.2925 | 51906.02    | 0.52678461  | 0.000147361 |
|                              | <i>Rps27a</i> | 3307.49175 | 5386.617667 | 0.614020143 | 0.008014311 |
|                              | <i>Rpl23a</i> | 2532.525   | 4295.69     | 0.589550224 | 0.000808677 |
|                              | <i>Rps7</i>   | 19918.15   | 31037.38    | 0.641747145 | 0.001317775 |
|                              | <i>Rpl37</i>  | 8059.096   | 12539.02333 | 0.64272119  | 0.010495203 |
|                              | <i>Rpl3</i>   | 29375.7225 | 48913.36333 | 0.600566399 | 0.004517845 |
|                              | <i>Rpl35a</i> | 520.100125 | 858.7334667 | 0.60565955  | 0.004753296 |
|                              | <i>Rps28</i>  | 12453.625  | 21054.65    | 0.591490478 | 0.014349745 |
|                              | <i>Rps14</i>  | 5758.791   | 8734.200667 | 0.659338069 | 0.001876575 |
|                              | <i>Fau</i>    | 5026.19925 | 8451.427667 | 0.594715999 | 0.005361187 |
| Mm_Focal_Adhesion_WP85_82887 | <i>Col3a1</i> | 326.099725 | 3478.643667 | 0.093743354 | 0.000491964 |
|                              | <i>Lamb3</i>  | 6.6191925  | 11.55468667 | 0.57285781  | 0.013320847 |
|                              | <i>Col5a2</i> | 20.040275  | 35.89594    | 0.558288068 | 0.029293837 |
|                              | <i>Fn1</i>    | 35.0263875 | 607.7869933 | 0.05762938  | 0.030387613 |
|                              | <i>Lamc1</i>  | 276.1241   | 467.9596    | 0.590059697 | 0.000317157 |
|                              | <i>Col5a1</i> | 8.18205    | 19.6147     | 0.417138677 | 0.000719352 |
|                              | <i>Lamc3</i>  | 31.3503525 | 67.87056    | 0.461913862 | 0.046603314 |
|                              | <i>Pdgfc</i>  | 23.3219575 | 93.67722    | 0.24896082  | 5.90E-05    |
|                              | <i>Jun</i>    | 950.163675 | 2867.254333 | 0.331384511 | 0.034334835 |
|                              |               |            |             |             |             |



---

|               |             |             |             |             |
|---------------|-------------|-------------|-------------|-------------|
| <i>Hgf</i>    | 27.1695     | 58.35599333 | 0.465581998 | 0.005642612 |
| <i>Pdgfra</i> | 24.722745   | 49.64476333 | 0.497993008 | 0.001644464 |
| <i>Spp1</i>   | 3003.63575  | 29620.42667 | 0.101404203 | 0.004556873 |
| <i>Pxn</i>    | 113.1230625 | 201.3696667 | 0.561768137 | 0.013849378 |
| <i>Actb</i>   | 92874.8975  | 151511.9    | 0.612987478 | 0.004902507 |
| <i>Colla2</i> | 98.95484    | 964.4898333 | 0.102598116 | 0.001109313 |
| <i>Cav2</i>   | 48.0455575  | 114.5031367 | 0.419600361 | 0.01651268  |
| <i>Cav1</i>   | 33.041455   | 53.37377    | 0.619057919 | 0.007974994 |
| <i>Met</i>    | 498.0858    | 972.3606333 | 0.512243897 | 0.004144254 |
| <i>Vwf</i>    | 87.52641    | 281.8331333 | 0.310561107 | 0.02399348  |
| <i>Itgam</i>  | 22.63767    | 42.04191    | 0.538454842 | 0.011538641 |
| <i>Dock1</i>  | 343.2434    | 561.4304667 | 0.611372949 | 0.018769646 |
| <i>Col4a2</i> | 149.598975  | 248.8547    | 0.601149888 | 0.003779064 |
| <i>Pdgfd</i>  | 133.3755225 | 392.3055667 | 0.339978664 | 0.001825636 |
| <i>Lamb2</i>  | 180.7027    | 464.8498667 | 0.388733466 | 0.004751886 |
| <i>Figf</i>   | 60.7189275  | 118.8654533 | 0.510820645 | 0.017878475 |
| <i>Flna</i>   | 1913.239    | 8263.932333 | 0.23151678  | 0.000895542 |
| <i>Lama4</i>  | 295.62555   | 527.1579    | 0.560791273 | 0.046260794 |
| <i>Igfl</i>   | 185.5764    | 1552.777433 | 0.119512556 | 0.002938087 |
| <i>Lama2</i>  | 108.9375325 | 397.5324667 | 0.274034303 | 8.59E-05    |
| <i>Col6a2</i> | 101.2813775 | 273.4747    | 0.370350082 | 0.010717393 |
| <i>Vtn</i>    | 589.036225  | 2251.151667 | 0.261659947 | 0.000630694 |
| <i>Colla1</i> | 193.3673    | 1547.431667 | 0.124960154 | 0.000121359 |
| <i>ErbB2</i>  | 11.0547875  | 33.71550667 | 0.327884365 | 0.000193152 |

---

|                                                                     |                |             |             |             |             |
|---------------------------------------------------------------------|----------------|-------------|-------------|-------------|-------------|
|                                                                     | <i>Itgb4</i>   | 31.9832075  | 71.04363    | 0.450191066 | 0.002481815 |
|                                                                     | <i>Rhob</i>    | 116.44297   | 213.6732    | 0.544958235 | 0.017788003 |
|                                                                     | <i>Itgb8</i>   | 400.79445   | 759.4512333 | 0.527742181 | 0.040237815 |
|                                                                     | <i>Shc3</i>    | 49.975155   | 93.23714333 | 0.536000495 | 0.034901654 |
|                                                                     | <i>Mylk</i>    | 89.8487425  | 338.5928667 | 0.26535923  | 0.00103148  |
|                                                                     | <i>Lama3</i>   | 208.004075  | 451.7060667 | 0.460485458 | 0.021773403 |
|                                                                     | <i>Pdgfrb</i>  | 400.01485   | 893.8316667 | 0.44752817  | 0.010281689 |
| Mm_PodNet-protein-protein_interactions_in_the_podocyte_WP2310_82879 | <i>Sulf1</i>   | 32.1025725  | 76.06706    | 0.422029884 | 0.012032786 |
|                                                                     | <i>Cfh</i>     | 1524.45775  | 6894.653667 | 0.221107227 | 0.001744584 |
|                                                                     | <i>Lamc1</i>   | 276.1241    | 467.9596    | 0.590059697 | 0.000317157 |
|                                                                     | <i>Tgfb2</i>   | 38.414105   | 76.54238333 | 0.501867114 | 0.028102025 |
|                                                                     | <i>Olfm1</i>   | 180.92065   | 392.8322    | 0.460554532 | 0.019978975 |
|                                                                     | <i>Angptl2</i> | 23.31332    | 40.80357667 | 0.571354815 | 0.000251307 |
|                                                                     | <i>Notch2</i>  | 37.3756075  | 99.10491667 | 0.377131718 | 0.011464067 |
|                                                                     | <i>Cyr61</i>   | 836.261425  | 3447.838    | 0.242546612 | 0.011006223 |
|                                                                     | <i>Hspg2</i>   | 216.628825  | 426.8094667 | 0.507553937 | 0.001490151 |
|                                                                     | <i>Pdpn</i>    | 43.299375   | 106.5801367 | 0.406261207 | 0.009832608 |
|                                                                     | <i>Agrn</i>    | 116.2691825 | 223.1902333 | 0.520942072 | 0.020137847 |
|                                                                     | <i>Spp1</i>    | 3003.63575  | 29620.42667 | 0.101404203 | 0.004556873 |
|                                                                     | <i>Pxn</i>     | 113.1230625 | 201.3696667 | 0.561768137 | 0.013849378 |
|                                                                     | <i>Slc29a4</i> | 623.63525   | 1052.802133 | 0.59235751  | 0.015002089 |
|                                                                     | <i>Arpc1b</i>  | 471.65085   | 961.9741    | 0.490294749 | 0.009200175 |
|                                                                     | <i>Actb</i>    | 92874.8975  | 151511.9    | 0.612987478 | 0.004902507 |
|                                                                     | <i>Smurf1</i>  | 155.4138    | 253.9444    | 0.61199932  | 0.005311685 |

---

|                |             |             |             |             |
|----------------|-------------|-------------|-------------|-------------|
| <i>Met</i>     | 498.0858    | 972.3606333 | 0.512243897 | 0.004144254 |
| <i>Cxcl12</i>  | 141.9617    | 583.5046667 | 0.243291456 | 0.000808209 |
| <i>Plaur</i>   | 46.1354675  | 134.2371867 | 0.343686192 | 0.004363717 |
| <i>Tgfb1</i>   | 172.230425  | 365.4635333 | 0.471265692 | 0.002123612 |
| <i>Cd151</i>   | 2039.922    | 4364.061    | 0.467436638 | 1.05E-05    |
| <i>Bcam</i>    | 282.532575  | 964.9272333 | 0.292801949 | 7.41E-05    |
| <i>Fcgrt</i>   | 77.5623225  | 222.8515333 | 0.348044823 | 0.002479283 |
| <i>Nr2f2</i>   | 396.749     | 1727.796467 | 0.229627162 | 0.002148058 |
| <i>Sh2d4a</i>  | 18.83314    | 73.66236667 | 0.255668408 | 0.003364604 |
| <i>Nrp1</i>    | 202.763175  | 356.0331333 | 0.569506476 | 0.006079936 |
| <i>Palld</i>   | 115.1482775 | 195.4604333 | 0.589112976 | 0.03167828  |
| <i>Myo1e</i>   | 318.794375  | 551.6008    | 0.577944004 | 0.013217954 |
| <i>Lamb2</i>   | 180.7027    | 464.8498667 | 0.388733466 | 0.004751886 |
| <i>Tagln</i>   | 235.52925   | 727.0724667 | 0.323941919 | 0.006492889 |
| <i>Smad3</i>   | 86.73054    | 149.1512333 | 0.581493951 | 0.004335903 |
| <i>Tgfbr2</i>  | 212.5581    | 346.3352667 | 0.613735073 | 0.015917667 |
| <i>Ctgf</i>    | 335.24885   | 1247.872267 | 0.268656383 | 0.002735711 |
| <i>Igfl</i>    | 185.5764    | 1552.777433 | 0.119512556 | 0.002938087 |
| <i>Tcf21</i>   | 23.9863025  | 48.16696333 | 0.497982452 | 0.028456607 |
| <i>Coll8a1</i> | 56.5854875  | 125.4698333 | 0.450988783 | 0.007384802 |
| <i>Myh10</i>   | 182.896325  | 302.1116    | 0.605393255 | 0.023187448 |
| <i>Itgb4</i>   | 31.9832075  | 71.04363    | 0.450191066 | 0.002481815 |
| <i>Wwc1</i>    | 40.109065   | 104.5829367 | 0.383514427 | 0.001082614 |
| <i>Cxcl16</i>  | 197.9695    | 564.8711    | 0.350468452 | 0.005438866 |

---

|                                                                      |               |             |             |             |             |
|----------------------------------------------------------------------|---------------|-------------|-------------|-------------|-------------|
|                                                                      | <i>Egln3</i>  | 59.1285275  | 433.1805667 | 0.136498569 | 0.000266898 |
|                                                                      | <i>Tgfb3</i>  | 126.7735    | 260.4992    | 0.486656005 | 0.002228968 |
|                                                                      | <i>Nid1</i>   | 525.1724    | 1118.360267 | 0.469591433 | 0.000463279 |
|                                                                      | <i>Dbn1</i>   | 61.7646625  | 142.2334333 | 0.434248552 | 0.003197544 |
|                                                                      | <i>Ctsl</i>   | 5221.62225  | 8314.422    | 0.628019873 | 0.014594389 |
|                                                                      | <i>Scel</i>   | 1373.3152   | 2170.505333 | 0.632716805 | 0.043048156 |
|                                                                      | <i>Bmp4</i>   | 20.8116275  | 46.56906333 | 0.446898134 | 0.008932982 |
|                                                                      | <i>Lgals1</i> | 120.1296    | 527.6775667 | 0.227657205 | 0.000525071 |
|                                                                      | <i>Angpt1</i> | 24.2376675  | 48.63081333 | 0.498401442 | 0.014243486 |
|                                                                      | <i>Igsf5</i>  | 1894.81625  | 3166.090333 | 0.598471948 | 0.029880387 |
|                                                                      | <i>Crim1</i>  | 341.426725  | 766.9369333 | 0.44518227  | 0.003041619 |
|                                                                      | <i>Epas1</i>  | 3306.0545   | 5852.216333 | 0.564923494 | 0.002255754 |
|                                                                      | <i>Ezr</i>    | 468.631675  | 1625.428333 | 0.288312727 | 0.001098085 |
|                                                                      | <i>Notch3</i> | 37.683475   | 92.42969    | 0.407698814 | 0.002838127 |
|                                                                      | <i>Plce1</i>  | 117.1150625 | 278.8296    | 0.42002378  | 0.005062133 |
| Mm_XPodNet_-protein-                                                 | <i>Sulf1</i>  | 32.1025725  | 76.06706    | 0.422029884 | 0.012032786 |
| protein_interactions_in_the_podocyte_expanded_by_STRING_WP2309_82878 | <i>Nrp2</i>   | 54.1929     | 132.4797    | 0.409065691 | 0.006362543 |
|                                                                      | <i>Fn1</i>    | 35.0263875  | 607.7869933 | 0.05762938  | 0.030387613 |
|                                                                      | <i>Cfh</i>    | 1524.45775  | 6894.653667 | 0.221107227 | 0.001744584 |
|                                                                      | <i>Lamc1</i>  | 276.1241    | 467.9596    | 0.590059697 | 0.000317157 |
|                                                                      | <i>Tgfb2</i>  | 38.414105   | 76.54238333 | 0.501867114 | 0.028102025 |
|                                                                      | <i>Vim</i>    | 839.006275  | 5155.641    | 0.162735589 | 0.00492182  |
|                                                                      | <i>Olfm1</i>  | 180.92065   | 392.8322    | 0.460554532 | 0.019978975 |
|                                                                      | <i>Lamc3</i>  | 31.3503525  | 67.87056    | 0.461913862 | 0.046603314 |

---

|                |             |             |             |             |
|----------------|-------------|-------------|-------------|-------------|
| <i>Angptl2</i> | 23.31332    | 40.80357667 | 0.571354815 | 0.000251307 |
| <i>Enkur</i>   | 19.414645   | 32.80255    | 0.591863895 | 0.017529259 |
| <i>Zeb2</i>    | 77.193385   | 219.4029333 | 0.351833879 | 0.005647433 |
| <i>Eng</i>     | 5011.766    | 9582.146333 | 0.52303167  | 0.009098857 |
| <i>Notch2</i>  | 37.3756075  | 99.10491667 | 0.377131718 | 0.011464067 |
| <i>Ngf</i>     | 161.286725  | 309.6286667 | 0.520903722 | 0.004524949 |
| <i>Csfl</i>    | 490.016125  | 960.1109333 | 0.510374487 | 0.000317365 |
| <i>Cyr61</i>   | 836.261425  | 3447.838    | 0.242546612 | 0.011006223 |
| <i>Lyn</i>     | 427.572675  | 1068.103367 | 0.400310202 | 0.037134753 |
| <i>Nr4a3</i>   | 30.954005   | 154.50463   | 0.200343543 | 0.022139649 |
| <i>Hspg2</i>   | 216.628825  | 426.8094667 | 0.507553937 | 0.001490151 |
| <i>Pdpn</i>    | 43.299375   | 106.5801367 | 0.406261207 | 0.009832608 |
| <i>Agrn</i>    | 116.2691825 | 223.1902333 | 0.520942072 | 0.020137847 |
| <i>Cdk6</i>    | 151.4389    | 253.8985    | 0.596454489 | 0.010418369 |
| <i>Ptpn13</i>  | 851.17575   | 1311.900333 | 0.648811292 | 0.021880418 |
| <i>Spp1</i>    | 3003.63575  | 29620.42667 | 0.101404203 | 0.004556873 |
| <i>Pxn</i>     | 113.1230625 | 201.3696667 | 0.561768137 | 0.013849378 |
| <i>Slc29a4</i> | 623.63525   | 1052.802133 | 0.59235751  | 0.015002089 |
| <i>Arpc1b</i>  | 471.65085   | 961.9741    | 0.490294749 | 0.009200175 |
| <i>Eln</i>     | 65.7795825  | 180.913     | 0.363597876 | 0.024602447 |
| <i>Cldn4</i>   | 825.069575  | 1412.263667 | 0.584217802 | 0.036567609 |
| <i>Actb</i>    | 92874.8975  | 151511.9    | 0.612987478 | 0.004902507 |
| <i>Smurf1</i>  | 155.4138    | 253.9444    | 0.61199932  | 0.005311685 |
| <i>Cav1</i>    | 33.041455   | 53.37377    | 0.619057919 | 0.007974994 |

---

---

|                 |             |             |             |             |
|-----------------|-------------|-------------|-------------|-------------|
| <i>Met</i>      | 498.0858    | 972.3606333 | 0.512243897 | 0.004144254 |
| <i>Fbln2</i>    | 62.622485   | 128.2571867 | 0.488257123 | 0.010488495 |
| <i>Bhlhe40</i>  | 799.024175  | 3761.526667 | 0.212420181 | 7.39E-05    |
| <i>Cxcl12</i>   | 141.9617    | 583.5046667 | 0.243291456 | 0.000808209 |
| <i>Vwf</i>      | 87.52641    | 281.8331333 | 0.310561107 | 0.02399348  |
| <i>Plaur</i>    | 46.1354675  | 134.2371867 | 0.343686192 | 0.004363717 |
| <i>Tgfb1</i>    | 172.230425  | 365.4635333 | 0.471265692 | 0.002123612 |
| <i>Gab2</i>     | 271.12415   | 411.2243667 | 0.659309545 | 0.029938969 |
| <i>Arrb1</i>    | 114.4340725 | 218.9162667 | 0.522729874 | 0.038342838 |
| <i>Htra1</i>    | 20.28432    | 40.07706333 | 0.506132893 | 0.033111589 |
| <i>Cd151</i>    | 2039.922    | 4364.061    | 0.467436638 | 1.05E-05    |
| <i>Cdc42ep5</i> | 19.1857475  | 29.71843    | 0.645584154 | 0.032252553 |
| <i>Bcam</i>     | 282.532575  | 964.9272333 | 0.292801949 | 7.41E-05    |
| <i>Zfp36</i>    | 286.78275   | 1173.418467 | 0.244399384 | 0.01588454  |
| <i>Fcgrt</i>    | 77.5623225  | 222.8515333 | 0.348044823 | 0.002479283 |
| <i>Nr2f2</i>    | 396.749     | 1727.796467 | 0.229627162 | 0.002148058 |
| <i>Nrip3</i>    | 94.52475    | 230.1133667 | 0.410774704 | 0.017706169 |
| <i>Sh2d4a</i>   | 18.83314    | 73.66236667 | 0.255668408 | 0.003364604 |
| <i>Cdh5</i>     | 1655.719    | 2825.671    | 0.585956044 | 0.00543529  |
| <i>Sntb2</i>    | 146.772025  | 221.4332    | 0.662827548 | 0.000327571 |
| <i>Plcg2</i>    | 40.5245975  | 61.07198333 | 0.663554633 | 0.033891134 |
| <i>Nrp1</i>     | 202.763175  | 356.0331333 | 0.569506476 | 0.006079936 |
| <i>Palld</i>    | 115.1482775 | 195.4604333 | 0.589112976 | 0.03167828  |
| <i>Gab1</i>     | 93.04781    | 198.0040667 | 0.469928783 | 0.02170104  |

---

---

|                |             |             |             |             |
|----------------|-------------|-------------|-------------|-------------|
| <i>Anxa2</i>   | 173.37005   | 747.8007667 | 0.231839893 | 5.19E-05    |
| <i>Myo1e</i>   | 318.794375  | 551.6008    | 0.577944004 | 0.013217954 |
| <i>Lamb2</i>   | 180.7027    | 464.8498667 | 0.388733466 | 0.004751886 |
| <i>Tagln</i>   | 235.52925   | 727.0724667 | 0.323941919 | 0.006492889 |
| <i>Smad3</i>   | 86.73054    | 149.1512333 | 0.581493951 | 0.004335903 |
| <i>Rab8b</i>   | 1915.4045   | 3444.444    | 0.556085249 | 0.013971467 |
| <i>Tgfbr2</i>  | 212.5581    | 346.3352667 | 0.613735073 | 0.015917667 |
| <i>Trf</i>     | 127.44395   | 1156.071233 | 0.110238839 | 0.028067544 |
| <i>L1cam</i>   | 82.6725625  | 216.8988333 | 0.381157248 | 0.020205943 |
| <i>Ctgf</i>    | 335.24885   | 1247.872267 | 0.268656383 | 0.002735711 |
| <i>Gjal</i>    | 271.023325  | 703.2965667 | 0.385361365 | 0.001799194 |
| <i>Igfl</i>    | 185.5764    | 1552.777433 | 0.119512556 | 0.002938087 |
| <i>Cdk17</i>   | 349.631525  | 549.7546    | 0.635977443 | 0.038997677 |
| <i>Tcf21</i>   | 23.9863025  | 48.16696333 | 0.497982452 | 0.028456607 |
| <i>Lama2</i>   | 108.9375325 | 397.5324667 | 0.274034303 | 8.59E-05    |
| <i>Hkl</i>     | 84.9669275  | 289.7776667 | 0.293214203 | 0.002618936 |
| <i>Col18a1</i> | 56.5854875  | 125.4698333 | 0.450988783 | 0.007384802 |
| <i>Syt1</i>    | 249.65415   | 815.0466    | 0.306306596 | 0.007822806 |
| <i>Gnb2l1</i>  | 13900.6525  | 22980.77333 | 0.604881842 | 0.005913472 |
| <i>Myh10</i>   | 182.896325  | 302.1116    | 0.605393255 | 0.023187448 |
| <i>Tax1bp3</i> | 370.243075  | 558.8700667 | 0.66248507  | 0.002460236 |
| <i>Vtn</i>     | 589.036225  | 2251.151667 | 0.261659947 | 0.000630694 |
| <i>Itgb4</i>   | 31.9832075  | 71.04363    | 0.450191066 | 0.002481815 |
| <i>Wwc1</i>    | 40.109065   | 104.5829367 | 0.383514427 | 0.001082614 |

---

---

|                 |            |             |             |             |
|-----------------|------------|-------------|-------------|-------------|
| <i>Cxcl16</i>   | 197.9695   | 564.8711    | 0.350468452 | 0.005438866 |
| <i>Abcc3</i>    | 148.44305  | 366.3747    | 0.405167305 | 3.66E-05    |
| <i>Pecam1</i>   | 1932.546   | 3347.473333 | 0.57731483  | 0.015736265 |
| <i>Dock4</i>    | 272.29515  | 441.0449    | 0.617386461 | 0.03426011  |
| <i>Egln3</i>    | 59.1285275 | 433.1805667 | 0.136498569 | 0.000266898 |
| <i>Tgfb3</i>    | 126.7735   | 260.4992    | 0.486656005 | 0.002228968 |
| <i>Nid1</i>     | 525.1724   | 1118.360267 | 0.469591433 | 0.000463279 |
| <i>Actn2</i>    | 28.7756675 | 139.40474   | 0.206418143 | 0.001313398 |
| <i>Dbn1</i>     | 61.7646625 | 142.2334333 | 0.434248552 | 0.003197544 |
| <i>Ctsl</i>     | 5221.62225 | 8314.422    | 0.628019873 | 0.014594389 |
| <i>Scel</i>     | 1373.3152  | 2170.505333 | 0.632716805 | 0.043048156 |
| <i>Bmp4</i>     | 20.8116275 | 46.56906333 | 0.446898134 | 0.008932982 |
| <i>Ajuba</i>    | 26.55721   | 85.82232    | 0.309444093 | 0.000841255 |
| <i>Sorbs3</i>   | 148.9443   | 283.3580333 | 0.525639941 | 0.005905825 |
| <i>Cdc42ep1</i> | 66.8877975 | 138.6352333 | 0.482473293 | 0.000518442 |
| <i>Lgals1</i>   | 120.1296   | 527.6775667 | 0.227657205 | 0.000525071 |
| <i>Angpt1</i>   | 24.2376675 | 48.63081333 | 0.498401442 | 0.014243486 |
| <i>Plec</i>     | 285.84015  | 473.1458333 | 0.604126952 | 0.015857587 |
| <i>Cldn8</i>    | 16.89709   | 44.4503     | 0.380134442 | 0.000669562 |
| <i>Igsf5</i>    | 1894.81625 | 3166.090333 | 0.598471948 | 0.029880387 |
| <i>Ltbpl</i>    | 30.51057   | 80.22275333 | 0.380323147 | 0.004515528 |
| <i>Crim1</i>    | 341.426725 | 766.9369333 | 0.44518227  | 0.003041619 |
| <i>Epas1</i>    | 3306.0545  | 5852.216333 | 0.564923494 | 0.002255754 |
| <i>Ezr</i>      | 468.631675 | 1625.428333 | 0.288312727 | 0.001098085 |

---



|                                                       |                |             |             |             |             |
|-------------------------------------------------------|----------------|-------------|-------------|-------------|-------------|
|                                                       | <i>Notch3</i>  | 37.683475   | 92.42969    | 0.407698814 | 0.002838127 |
|                                                       | <i>Pdgfrb</i>  | 400.01485   | 893.8316667 | 0.44752817  | 0.010281689 |
|                                                       | <i>Csflr</i>   | 88.406155   | 263.3199333 | 0.33573666  | 0.005290299 |
|                                                       | <i>Rin1</i>    | 14.1628825  | 22.20940667 | 0.637697473 | 0.001335313 |
|                                                       | <i>Ffar4</i>   | 47.1836425  | 80.31835    | 0.587457816 | 0.039582994 |
|                                                       | <i>Plce1</i>   | 117.1150625 | 278.8296    | 0.42002378  | 0.005062133 |
|                                                       | <i>Sorbs1</i>  | 672.992725  | 1504.442333 | 0.447337003 | 0.009214168 |
|                                                       | <i>Blnk</i>    | 26.8696975  | 72.92096333 | 0.368476996 | 0.026666741 |
| Mm_Prostaglandin_Synthesis_and_Regulation_WP374_69204 | <i>Hsd11b1</i> | 132.952815  | 385.3149333 | 0.345049733 | 0.013450618 |
|                                                       | <i>Ptgs1</i>   | 76.2559025  | 243.3698667 | 0.313333378 | 0.004732459 |
|                                                       | <i>SI00a6</i>  | 23.2272925  | 84.45539    | 0.275024395 | 0.004501011 |
|                                                       | <i>SI00a10</i> | 1463.435    | 2917.734667 | 0.501565484 | 0.022618669 |
|                                                       | <i>Ptger3</i>  | 32.6654625  | 409.4368333 | 0.079781446 | 6.17E-05    |
|                                                       | <i>Anxa3</i>   | 157.829225  | 561.0061333 | 0.281332441 | 0.000174098 |
|                                                       | <i>Tbxas1</i>  | 25.15005    | 45.13677    | 0.557196494 | 0.034487258 |
|                                                       | <i>Hpgd</i>    | 64.2974075  | 185.5881333 | 0.346452148 | 0.012379314 |
|                                                       | <i>Anxa2</i>   | 173.37005   | 747.8007667 | 0.231839893 | 5.19E-05    |
|                                                       | <i>Ednrb</i>   | 2684.9895   | 5889.460667 | 0.455897348 | 0.001914478 |
|                                                       | <i>Anxa1</i>   | 40.81987    | 126.2498233 | 0.323326155 | 0.049898577 |
| Mm_Endochondral_Ossification_WP1270_87973             | <i>Ddr2</i>    | 38.9604875  | 129.4284667 | 0.301019463 | 0.001073084 |
|                                                       | <i>Tgfb2</i>   | 38.414105   | 76.54238333 | 0.501867114 | 0.028102025 |
|                                                       | <i>Fgfr3</i>   | 42.134605   | 258.0517667 | 0.163279661 | 0.00197107  |
|                                                       | <i>Spp1</i>    | 3003.63575  | 29620.42667 | 0.101404203 | 0.004556873 |
|                                                       | <i>Mgp</i>     | 1123.9309   | 5824.687667 | 0.192959857 | 0.001566508 |

|                                                        |                 |            |             |             |             |
|--------------------------------------------------------|-----------------|------------|-------------|-------------|-------------|
|                                                        | <i>Tgfb1</i>    | 172.230425 | 365.4635333 | 0.471265692 | 0.002123612 |
|                                                        | <i>Serpinh1</i> | 239.08935  | 717.9896    | 0.332998347 | 5.73E-05    |
|                                                        | <i>Sox6</i>     | 19.3012925 | 39.57107667 | 0.487762632 | 0.023496758 |
|                                                        | <i>Fgfr1</i>    | 32.8912025 | 74.04085333 | 0.444230462 | 0.004923827 |
|                                                        | <i>Timp3</i>    | 949.175    | 1525.720333 | 0.62211598  | 0.015876356 |
|                                                        | <i>Igf1</i>     | 185.5764   | 1552.777433 | 0.119512556 | 0.002938087 |
|                                                        | <i>Enpp1</i>    | 104.132685 | 242.9446667 | 0.42862717  | 0.00708508  |
|                                                        | <i>Sox9</i>     | 59.449575  | 242.679     | 0.244972062 | 0.004226726 |
|                                                        | <i>Mef2c</i>    | 1455.98875 | 3166.981    | 0.459740286 | 0.047085674 |
|                                                        | <i>Ctsl</i>     | 5221.62225 | 8314.422    | 0.628019873 | 0.014594389 |
|                                                        | <i>Slc38a2</i>  | 20283.7725 | 34474.61333 | 0.588368383 | 0.008978424 |
| Mm_Complement_Activation_Classical_Pathway_WP200_72061 | <i>Clqb</i>     | 112.6643   | 180.2585667 | 0.625014955 | 0.028655717 |
|                                                        | <i>Clqc</i>     | 41.6008625 | 93.15491667 | 0.446577207 | 0.01723451  |
|                                                        | <i>Clra</i>     | 83.4978725 | 265.4218667 | 0.314585507 | 0.029629821 |
|                                                        | <i>Clsl</i>     | 207.250225 | 557.3640667 | 0.371839947 | 0.007369744 |
|                                                        | <i>C7</i>       | 157.964565 | 402.2963333 | 0.392657233 | 0.037783103 |
|                                                        | <i>Maspl</i>    | 39.2921275 | 133.4244467 | 0.294489717 | 0.007003271 |
|                                                        | <i>C4b</i>      | 39.97345   | 116.0005667 | 0.344597024 | 0.023438414 |
| Mm_Spinal_Cord_Injury_WP2432_87679                     | <i>Selp</i>     | 32.314285  | 94.40940333 | 0.342278246 | 0.015221083 |
|                                                        | <i>Fcgr2b</i>   | 41.166975  | 174.843     | 0.23545109  | 0.003661907 |
|                                                        | <i>Vim</i>      | 839.006275 | 5155.641    | 0.162735589 | 0.00492182  |
|                                                        | <i>Rhoc</i>     | 464.71365  | 735.0998    | 0.632177631 | 0.025502295 |
|                                                        | <i>Tlr4</i>     | 46.4875025 | 82.52730667 | 0.563298433 | 0.02321352  |
|                                                        | <i>Tgfb1</i>    | 172.230425 | 365.4635333 | 0.471265692 | 0.002123612 |

|                                                    |                 |             |             |             |             |
|----------------------------------------------------|-----------------|-------------|-------------|-------------|-------------|
|                                                    | <i>Rgma</i>     | 40.8127425  | 72.19470333 | 0.565314914 | 0.002078039 |
|                                                    | <i>Zfp36</i>    | 286.78275   | 1173.418467 | 0.244399384 | 0.01588454  |
|                                                    | <i>Pirb</i>     | 57.7231525  | 109.05524   | 0.529301962 | 0.045006507 |
|                                                    | <i>Mmp12</i>    | 92.7276125  | 317.8057667 | 0.291774481 | 0.025074631 |
|                                                    | <i>Icam1</i>    | 28.05433    | 51.33745333 | 0.546469063 | 0.022766703 |
|                                                    | <i>Gjal</i>     | 271.023325  | 703.2965667 | 0.385361365 | 0.001799194 |
|                                                    | <i>Sox9</i>     | 59.449575   | 242.679     | 0.244972062 | 0.004226726 |
|                                                    | <i>Rhob</i>     | 116.44297   | 213.6732    | 0.544958235 | 0.017788003 |
|                                                    | <i>Rtn4r</i>    | 14.581325   | 22.41890333 | 0.650403134 | 0.021542628 |
|                                                    | <i>Egr1</i>     | 2982.07575  | 9096.248    | 0.327835801 | 0.049672302 |
|                                                    | <i>Aqp4</i>     | 1047.788725 | 6970.607333 | 0.15031527  | 0.000357011 |
|                                                    | <i>Sema6a</i>   | 204.9183    | 441.1739333 | 0.464484151 | 0.016905262 |
|                                                    | <i>Anxa1</i>    | 40.81987    | 126.2498233 | 0.323326155 | 0.049898577 |
| Mm_Complement_and_Coagulation_Cascades_WP449_71733 | <i>Cfh</i>      | 1524.45775  | 6894.653667 | 0.221107227 | 0.001744584 |
|                                                    | <i>Tfpi</i>     | 110.79045   | 307.4441333 | 0.360359617 | 0.000638669 |
|                                                    | <i>Serping1</i> | 14695.7445  | 30927.50333 | 0.475167502 | 0.023970877 |
|                                                    | <i>Clqb</i>     | 112.6643    | 180.2585667 | 0.625014955 | 0.028655717 |
|                                                    | <i>Clqc</i>     | 41.6008625  | 93.15491667 | 0.446577207 | 0.01723451  |
|                                                    | <i>Clra</i>     | 83.4978725  | 265.4218667 | 0.314585507 | 0.029629821 |
|                                                    | <i>Vwf</i>      | 87.52641    | 281.8331333 | 0.310561107 | 0.02399348  |
|                                                    | <i>Clsl</i>     | 207.250225  | 557.3640667 | 0.371839947 | 0.007369744 |
|                                                    | <i>Plaur</i>    | 46.1354675  | 134.2371867 | 0.343686192 | 0.004363717 |
|                                                    | <i>C7</i>       | 157.964565  | 402.2963333 | 0.392657233 | 0.037783103 |
|                                                    | <i>Pros1</i>    | 72.265575   | 179.3809333 | 0.40286096  | 0.001131909 |

|                                                                |                |             |             |             |             |
|----------------------------------------------------------------|----------------|-------------|-------------|-------------|-------------|
|                                                                | <i>Masp1</i>   | 39.2921275  | 133.4244467 | 0.294489717 | 0.007003271 |
|                                                                | <i>C4b</i>     | 39.97345    | 116.0005667 | 0.344597024 | 0.023438414 |
|                                                                | <i>Cfb</i>     | 11.51019    | 27.03415333 | 0.425764767 | 0.000612751 |
| Mm_Macrophage_markers_WP2271_69962                             | <i>Cd52</i>    | 56.147335   | 153.92037   | 0.364781705 | 0.038106291 |
|                                                                | <i>Cd163</i>   | 19.988915   | 36.11256667 | 0.553516874 | 0.012764355 |
|                                                                | <i>Lyz2</i>    | 253.955825  | 3170.484    | 0.080100018 | 0.002855792 |
|                                                                | <i>Cd68</i>    | 126.1940475 | 314.5799333 | 0.401150977 | 0.025679705 |
|                                                                | <i>Cd14</i>    | 18.55365    | 80.2196     | 0.231285746 | 0.004969535 |
| Mm_TYROBP_Causal_Network_WP3625_90841                          | <i>Dpyd</i>    | 29.1266125  | 43.92146    | 0.663152193 | 0.007918875 |
|                                                                | <i>Clqc</i>    | 41.6008625  | 93.15491667 | 0.446577207 | 0.01723451  |
|                                                                | <i>Spp1</i>    | 3003.63575  | 29620.42667 | 0.101404203 | 0.004556873 |
|                                                                | <i>Tyrobp</i>  | 27.26938    | 57.28381667 | 0.476039859 | 0.007274133 |
|                                                                | <i>Kcne3</i>   | 53.7096925  | 250.4577333 | 0.214446133 | 0.000336572 |
|                                                                | <i>Itgam</i>   | 22.63767    | 42.04191    | 0.538454842 | 0.011538641 |
|                                                                | <i>Igsf6</i>   | 20.6900025  | 47.04756    | 0.439767812 | 0.009876198 |
|                                                                | <i>Elf4</i>    | 36.1456175  | 90.56087667 | 0.399130605 | 0.008639425 |
|                                                                | <i>Cxcl16</i>  | 197.9695    | 564.8711    | 0.350468452 | 0.005438866 |
|                                                                | <i>Npc2</i>    | 1092.132375 | 1893.487333 | 0.576783565 | 0.022403876 |
|                                                                | <i>Lhfpl2</i>  | 27.13682    | 42.50462    | 0.638444009 | 0.021543541 |
|                                                                | <i>Slc7a7</i>  | 55.8654225  | 87.03153667 | 0.641898611 | 0.006032498 |
|                                                                | <i>Zfp36l2</i> | 778.835175  | 1574.773333 | 0.4945697   | 0.020605066 |
| Mm_Focal_Adhesion-PI3K-Akt-mTOR-signaling_pathway_WP2841_89989 | <i>Col3a1</i>  | 326.099725  | 3478.643667 | 0.093743354 | 0.000491964 |
|                                                                | <i>Lamb3</i>   | 6.6191925   | 11.55468667 | 0.57285781  | 0.013320847 |
|                                                                | <i>Col5a2</i>  | 20.040275   | 35.89594    | 0.558288068 | 0.029293837 |

---

|                 |             |             |             |             |
|-----------------|-------------|-------------|-------------|-------------|
| <i>Fnl</i>      | 35.0263875  | 607.7869933 | 0.05762938  | 0.030387613 |
| <i>Lamc1</i>    | 276.1241    | 467.9596    | 0.590059697 | 0.000317157 |
| <i>Col5a1</i>   | 8.18205     | 19.6147     | 0.417138677 | 0.000719352 |
| <i>Lamc3</i>    | 31.3503525  | 67.87056    | 0.461913862 | 0.046603314 |
| <i>Pfkfb3</i>   | 53.326055   | 391.1625667 | 0.136327091 | 0.000361581 |
| <i>Pdgfc</i>    | 23.3219575  | 93.67722    | 0.24896082  | 5.90E-05    |
| <i>Ngf</i>      | 161.286725  | 309.6286667 | 0.520903722 | 0.004524949 |
| <i>Csf1</i>     | 490.016125  | 960.1109333 | 0.510374487 | 0.000317365 |
| <i>Slc2a1</i>   | 627.8459    | 1069.8136   | 0.586874106 | 0.016112861 |
| <i>Hgf</i>      | 27.1695     | 58.35599333 | 0.465581998 | 0.005642612 |
| <i>Fgfr3</i>    | 42.134605   | 258.0517667 | 0.163279661 | 0.00197107  |
| <i>Pdgfra</i>   | 24.722745   | 49.64476333 | 0.497993008 | 0.001644464 |
| <i>Spp1</i>     | 3003.63575  | 29620.42667 | 0.101404203 | 0.004556873 |
| <i>Ppargc1a</i> | 164.4451    | 599.9447333 | 0.274100414 | 0.010033555 |
| <i>Colla2</i>   | 98.95484    | 964.4898333 | 0.102598116 | 0.001109313 |
| <i>Met</i>      | 498.0858    | 972.3606333 | 0.512243897 | 0.004144254 |
| <i>Vwf</i>      | 87.52641    | 281.8331333 | 0.310561107 | 0.02399348  |
| <i>Itgam</i>    | 22.63767    | 42.04191    | 0.538454842 | 0.011538641 |
| <i>Fgfr2</i>    | 41.53819    | 99.78233667 | 0.416288006 | 0.009120717 |
| <i>Col4a2</i>   | 149.598975  | 248.8547    | 0.601149888 | 0.003779064 |
| <i>Fgfr1</i>    | 32.8912025  | 74.04085333 | 0.444230462 | 0.004923827 |
| <i>Pdgfd</i>    | 133.3755225 | 392.3055667 | 0.339978664 | 0.001825636 |
| <i>Lamb2</i>    | 180.7027    | 464.8498667 | 0.388733466 | 0.004751886 |
| <i>Figf</i>     | 60.7189275  | 118.8654533 | 0.510820645 | 0.017878475 |

---

|                                 |                |             |             |             |             |
|---------------------------------|----------------|-------------|-------------|-------------|-------------|
|                                 | <i>Lama4</i>   | 295.62555   | 527.1579    | 0.560791273 | 0.046260794 |
|                                 | <i>Igfl</i>    | 185.5764    | 1552.777433 | 0.119512556 | 0.002938087 |
|                                 | <i>Kitl</i>    | 579.38455   | 1204.362233 | 0.481071669 | 0.015710689 |
|                                 | <i>Lama2</i>   | 108.9375325 | 397.5324667 | 0.274034303 | 8.59E-05    |
|                                 | <i>Col6a2</i>  | 101.2813775 | 273.4747    | 0.370350082 | 0.010717393 |
|                                 | <i>Vtn</i>     | 589.036225  | 2251.151667 | 0.261659947 | 0.000630694 |
|                                 | <i>Colla1</i>  | 193.3673    | 1547.431667 | 0.124960154 | 0.000121359 |
|                                 | <i>Itgb4</i>   | 31.9832075  | 71.04363    | 0.450191066 | 0.002481815 |
|                                 | <i>Itgb8</i>   | 400.79445   | 759.4512333 | 0.527742181 | 0.040237815 |
|                                 | <i>Fgfr4</i>   | 12.3935275  | 20.70385    | 0.5986098   | 0.011933838 |
|                                 | <i>Osmr</i>    | 73.2079075  | 149.7408    | 0.488897532 | 0.004530251 |
|                                 | <i>Angpt1</i>  | 24.2376675  | 48.63081333 | 0.498401442 | 0.014243486 |
|                                 | <i>Epas1</i>   | 3306.0545   | 5852.216333 | 0.564923494 | 0.002255754 |
|                                 | <i>Lama3</i>   | 208.004075  | 451.7060667 | 0.460485458 | 0.021773403 |
|                                 | <i>Pdgfrb</i>  | 400.01485   | 893.8316667 | 0.44752817  | 0.010281689 |
|                                 | <i>Csflr</i>   | 88.406155   | 263.3199333 | 0.33573666  | 0.005290299 |
|                                 | <i>Ppp2r2b</i> | 40.14104    | 92.52508    | 0.43383956  | 0.004607635 |
| Mm_Oxidative_Stress_WP412_89965 | <i>Cat</i>     | 796.6019    | 2646.369    | 0.301016941 | 0.000585539 |
|                                 | <i>Mgst1</i>   | 83.856195   | 1273.3054   | 0.065857095 | 0.000468062 |
|                                 | <i>Hmox1</i>   | 131.23145   | 287.3418333 | 0.456708473 | 0.036457211 |
|                                 | <i>Mtl</i>     | 118329.3375 | 187821.3667 | 0.630009991 | 0.049223099 |
|                                 | <i>Nfix</i>    | 2348.8075   | 4300.999    | 0.546107428 | 0.01055731  |
|                                 | <i>Junb</i>    | 168.2739    | 635.3924    | 0.264834612 | 0.022890086 |
|                                 | <i>Cyba</i>    | 83.6466425  | 137.6863    | 0.607516089 | 0.01177478  |

|                                                                 |              |             |             |             |             |
|-----------------------------------------------------------------|--------------|-------------|-------------|-------------|-------------|
| Mm_Alpha6-Beta4_Integrin_Signaling_Pathway_WP488_72049          | <i>Lamb3</i> | 6.6191925   | 11.55468667 | 0.57285781  | 0.013320847 |
|                                                                 | <i>Lamc1</i> | 276.1241    | 467.9596    | 0.590059697 | 0.000317157 |
|                                                                 | <i>Vim</i>   | 839.006275  | 5155.641    | 0.162735589 | 0.00492182  |
|                                                                 | <i>Met</i>   | 498.0858    | 972.3606333 | 0.512243897 | 0.004144254 |
|                                                                 | <i>Cd151</i> | 2039.922    | 4364.061    | 0.467436638 | 1.05E-05    |
|                                                                 | <i>Lamb2</i> | 180.7027    | 464.8498667 | 0.388733466 | 0.004751886 |
|                                                                 | <i>Smad3</i> | 86.73054    | 149.1512333 | 0.581493951 | 0.004335903 |
|                                                                 | <i>Ar</i>    | 15.8150275  | 42.60934333 | 0.371163371 | 0.001942655 |
|                                                                 | <i>Lama2</i> | 108.9375325 | 397.5324667 | 0.274034303 | 8.59E-05    |
|                                                                 | <i>ErbB2</i> | 11.0547875  | 33.71550667 | 0.327884365 | 0.000193152 |
|                                                                 | <i>Itgb4</i> | 31.9832075  | 71.04363    | 0.450191066 | 0.002481815 |
|                                                                 | <i>Plec</i>  | 285.84015   | 473.1458333 | 0.604126952 | 0.015857587 |
|                                                                 | <i>Lama3</i> | 208.004075  | 451.7060667 | 0.460485458 | 0.021773403 |
| Mm_Striated_Muscle_Contraction_WP216_87693                      | <i>Des</i>   | 34.7486725  | 72.49361    | 0.479334282 | 0.047635859 |
|                                                                 | <i>Vim</i>   | 839.006275  | 5155.641    | 0.162735589 | 0.00492182  |
|                                                                 | <i>Myl9</i>  | 231.853275  | 508.6976667 | 0.455778137 | 0.005564108 |
|                                                                 | <i>Tpm3</i>  | 11691.14725 | 17678.73667 | 0.661311239 | 0.003690043 |
|                                                                 | <i>Tpm2</i>  | 65.5363225  | 117.9875    | 0.555451404 | 0.015289586 |
|                                                                 | <i>Tpm4</i>  | 1126.59605  | 1720.194    | 0.654923834 | 0.003016711 |
|                                                                 | <i>Tpm1</i>  | 3989.42775  | 6916.448333 | 0.576802942 | 0.002227663 |
|                                                                 | <i>Dmd</i>   | 29.0132125  | 59.90378667 | 0.484330192 | 0.014739867 |
|                                                                 | <i>Actn2</i> | 28.7756675  | 139.40474   | 0.206418143 | 0.001313398 |
|                                                                 | <i>Acta2</i> | 1333.0087   | 4338.853667 | 0.30722601  | 0.043526171 |
| Mm_Primary_Focal_Segmental_Glomerulosclerosis_FSGS_WP2573_89874 | <i>Vim</i>   | 839.006275  | 5155.641    | 0.162735589 | 0.00492182  |

|                                              |               |             |             |             |             |
|----------------------------------------------|---------------|-------------|-------------|-------------|-------------|
|                                              | <i>Jag1</i>   | 163.870325  | 454.4074667 | 0.360624191 | 0.000939873 |
|                                              | <i>Tlr4</i>   | 46.4875025  | 82.52730667 | 0.563298433 | 0.02321352  |
|                                              | <i>Agrn</i>   | 116.2691825 | 223.1902333 | 0.520942072 | 0.020137847 |
|                                              | <i>Plaur</i>  | 46.1354675  | 134.2371867 | 0.343686192 | 0.004363717 |
|                                              | <i>Tgfb1</i>  | 172.230425  | 365.4635333 | 0.471265692 | 0.002123612 |
|                                              | <i>Cd151</i>  | 2039.922    | 4364.061    | 0.467436638 | 1.05E-05    |
|                                              | <i>Myo1e</i>  | 318.794375  | 551.6008    | 0.577944004 | 0.013217954 |
|                                              | <i>Lamb2</i>  | 180.7027    | 464.8498667 | 0.388733466 | 0.004751886 |
|                                              | <i>Vtn</i>    | 589.036225  | 2251.151667 | 0.261659947 | 0.000630694 |
|                                              | <i>Itgb4</i>  | 31.9832075  | 71.04363    | 0.450191066 | 0.002481815 |
|                                              | <i>Ctsl</i>   | 5221.62225  | 8314.422    | 0.628019873 | 0.014594389 |
|                                              | <i>Plce1</i>  | 117.1150625 | 278.8296    | 0.42002378  | 0.005062133 |
| Mm_Matrix_Metalloproteinases_WP441_69114     | <i>Mmp23</i>  | 38.3210925  | 85.85138667 | 0.446365446 | 0.005474584 |
|                                              | <i>Mmp2</i>   | 122.763455  | 1084.967567 | 0.113149424 | 0.000930202 |
|                                              | <i>Mmp15</i>  | 50.2912625  | 93.54439667 | 0.537619187 | 0.002008472 |
|                                              | <i>Mmp12</i>  | 92.7276125  | 317.8057667 | 0.291774481 | 0.025074631 |
|                                              | <i>Timp3</i>  | 949.175     | 1525.720333 | 0.62211598  | 0.015876356 |
|                                              | <i>Timp2</i>  | 1775.6685   | 3687.19     | 0.481577706 | 0.022914666 |
|                                              | <i>Mmp14</i>  | 33.121      | 145.59698   | 0.227484114 | 0.003437688 |
| Mm_Inflammatory_Response_Pathway_WP458_78438 | <i>Col3a1</i> | 326.099725  | 3478.643667 | 0.093743354 | 0.000491964 |
|                                              | <i>Fn1</i>    | 35.0263875  | 607.7869933 | 0.05762938  | 0.030387613 |
|                                              | <i>Lamc1</i>  | 276.1241    | 467.9596    | 0.590059697 | 0.000317157 |
|                                              | <i>Colla2</i> | 98.95484    | 964.4898333 | 0.102598116 | 0.001109313 |
|                                              | <i>Lamb2</i>  | 180.7027    | 464.8498667 | 0.388733466 | 0.004751886 |



|                                                                                                |                 |            |             |             |             |
|------------------------------------------------------------------------------------------------|-----------------|------------|-------------|-------------|-------------|
|                                                                                                | <i>Vtn</i>      | 589.036225 | 2251.151667 | 0.261659947 | 0.000630694 |
|                                                                                                | <i>Colla1</i>   | 193.3673   | 1547.431667 | 0.124960154 | 0.000121359 |
| Mm_Microglia_Pathogen_Phagocytosis_Pathway_WP3626_87399                                        | <i>Vav3</i>     | 65.3230775 | 177.4979    | 0.368021692 | 0.001313054 |
|                                                                                                | <i>Lyn</i>      | 427.572675 | 1068.103367 | 0.400310202 | 0.037134753 |
|                                                                                                | <i>Clqb</i>     | 112.6643   | 180.2585667 | 0.625014955 | 0.028655717 |
|                                                                                                | <i>Clqc</i>     | 41.6008625 | 93.15491667 | 0.446577207 | 0.01723451  |
|                                                                                                | <i>Arpc1b</i>   | 471.65085  | 961.9741    | 0.490294749 | 0.009200175 |
|                                                                                                | <i>Tyrobp</i>   | 27.26938   | 57.28381667 | 0.476039859 | 0.007274133 |
|                                                                                                | <i>Itgam</i>    | 22.63767   | 42.04191    | 0.538454842 | 0.011538641 |
|                                                                                                | <i>Plcg2</i>    | 40.5245975 | 61.07198333 | 0.663554633 | 0.033891134 |
|                                                                                                | <i>Cyba</i>     | 83.6466425 | 137.6863    | 0.607516089 | 0.01177478  |
| Mm_Factors_and_pathways_affecting_insulin-like_growth_factor_(IGF1)-Akt_signaling_WP3675_90178 | <i>Igfbp5</i>   | 553.147425 | 2197.324333 | 0.251736813 | 0.000392009 |
|                                                                                                | <i>Pdk1</i>     | 1323.19025 | 2059.256    | 0.642557433 | 0.001545921 |
|                                                                                                | <i>Pld1</i>     | 135.126185 | 400.4532333 | 0.337433123 | 0.001321362 |
|                                                                                                | <i>Ppargc1a</i> | 164.4451   | 599.9447333 | 0.274100414 | 0.010033555 |
|                                                                                                | <i>Smad3</i>    | 86.73054   | 149.1512333 | 0.581493951 | 0.004335903 |
|                                                                                                | <i>Igfl</i>     | 185.5764   | 1552.777433 | 0.119512556 | 0.002938087 |
|                                                                                                | <i>Igfbp4</i>   | 495.7088   | 1738.672    | 0.285107714 | 0.014088425 |
| Mm_Irinotecan_Pathway_WP475_69144                                                              | <i>Bche</i>     | 18.856555  | 36.35101    | 0.51873538  | 0.00587686  |
|                                                                                                | <i>Abcg2</i>    | 248.721675 | 661.3175    | 0.376100247 | 0.001721492 |
|                                                                                                | <i>Ces1d</i>    | 47.91472   | 101.3924833 | 0.472566786 | 0.008830786 |
| Mm_Statin_Pathway_WP1_73346                                                                    | <i>Pltp</i>     | 402.6241   | 1533.294333 | 0.262587614 | 0.001958269 |
|                                                                                                | <i>Abca1</i>    | 3880.021   | 6063.163    | 0.63993348  | 0.037501272 |
|                                                                                                | <i>Scarb1</i>   | 578.510225 | 1043.131167 | 0.554590107 | 0.041360662 |

---

|             |            |             |             |             |
|-------------|------------|-------------|-------------|-------------|
| <i>ApoE</i> | 12382.705  | 44541.50333 | 0.278003751 | 0.001195322 |
| <i>Lrp1</i> | 180.922825 | 596.3482667 | 0.303384507 | 0.000288625 |

---

**Supplementary Table 4.** The expression levels of genes involved in glycolysis or the tricarboxylic acid (TCA) cycle

Glycolysis

| Gene Symbol    | Average value<br>(test: <i>Gck</i> <sup>+/-</sup> <i>db/db</i> ) | Average value<br>(control: <i>Gck</i> <sup>+/+</sup> <i>db/db</i> ) | Ratio (test/control) | P-value     |
|----------------|------------------------------------------------------------------|---------------------------------------------------------------------|----------------------|-------------|
| <i>Adh1</i>    | 20358.3225                                                       | 15403.78                                                            | 1.32164459           | 0.472674405 |
| <i>Adh5</i>    | 58.379585                                                        | 63.04105333                                                         | 0.926056624          | 0.191007829 |
| <i>Akr1a1</i>  | 7520.8275                                                        | 8996.097                                                            | 0.83601005           | 0.141958057 |
| <i>Aldh2</i>   | 737.8592                                                         | 721.3382667                                                         | 1.022903171          | 0.805463794 |
| <i>Aldh3a2</i> | 4900.02975                                                       | 4308.062                                                            | 1.137409292          | 0.380166383 |
| <i>Aldh7a1</i> | 714.061025                                                       | 759.608                                                             | 0.940038842          | 0.136037097 |
| <i>Aldh9a1</i> | 1903.56425                                                       | 1560.614333                                                         | 1.219753151          | 0.279561892 |
| <i>Aldn1b1</i> | 19.0053275                                                       | 17.99901667                                                         | 1.055909212          | 0.977406775 |
| <i>Aldoa</i>   | 23043.925                                                        | 28168.70667                                                         | 0.818068265          | 0.039625854 |
| <i>Aldob</i>   | 82.3066675                                                       | 673.8796                                                            | 0.122138536          | 0.000108862 |
| <i>Aldoc</i>   | 144.113975                                                       | 226.7789667                                                         | 0.635482105          | 0.080085587 |
| <i>Dlat</i>    | 2080.175                                                         | 2453.911333                                                         | 0.847697703          | 0.031575591 |
| <i>Dld</i>     | 4266.36275                                                       | 4227.034                                                            | 1.009304101          | 0.835698858 |
| <i>Eno1</i>    | 7689.09575                                                       | 16571.64                                                            | 0.463991237          | 0.002324667 |
| <i>Eno1b</i>   | 32.5652825                                                       | 40.07652                                                            | 0.812577602          | 0.002202492 |
| <i>Eno2</i>    | 41.0012825                                                       | 49.31694                                                            | 0.831383344          | 0.160530945 |
| <i>Eno3</i>    | 62.9921425                                                       | 52.35201                                                            | 1.203242101          | 0.092208151 |
| <i>Fbp1</i>    | 37.3361025                                                       | 35.21626667                                                         | 1.060194792          | 0.593938791 |
| <i>Fbp2</i>    | 65.22797                                                         | 63.53738333                                                         | 1.026607748          | 0.827713365 |
| <i>G6pc2</i>   | 444359.4                                                         | 321449.9                                                            | 1.382359739          | 0.179610521 |
| <i>Gapdh</i>   | 56832.3525                                                       | 60973.58667                                                         | 0.932081506          | 0.29585255  |
| <i>Gapdhs</i>  | 8.9654375                                                        | 7.994276667                                                         | 1.121482014          | 0.386133689 |
| <i>Gpi1</i>    | 7216.7365                                                        | 11111.294                                                           | 0.649495594          | 0.004126932 |
| <i>Hk1</i>     | 84.9669275                                                       | 289.7776667                                                         | 0.293214203          | 0.002618936 |
| <i>Ldha</i>    | 521.991225                                                       | 732.2255667                                                         | 0.712883091          | 0.000886298 |
| <i>Pdha1</i>   | 1242.34675                                                       | 1517.750333                                                         | 0.81854487           | 0.142364434 |
| <i>Pdhb</i>    | 21547.2475                                                       | 20684.48333                                                         | 1.041710695          | 0.838462558 |
| <i>Pfkl</i>    | 200.911275                                                       | 213.7794667                                                         | 0.939806232          | 0.63991739  |
| <i>Pfkm</i>    | 651.60205                                                        | 574.7388                                                            | 1.133735968          | 0.410052049 |

|              |            |             |             |             |
|--------------|------------|-------------|-------------|-------------|
| <i>Pfkp</i>  | 259.868625 | 408.0441333 | 0.636864015 | 0.002588289 |
| <i>Pgam1</i> | 2508.38125 | 2644.718    | 0.948449419 | 0.647881373 |
| <i>Pgk1</i>  | 4532.0225  | 4375.321333 | 1.035814779 | 0.601640323 |
| <i>Pgm1</i>  | 767.249925 | 644.4023    | 1.190638092 | 0.194919995 |
| <i>Pgm2</i>  | 1260.05825 | 1241.859667 | 1.014654299 | 0.86227142  |
| <i>Pkm</i>   | 38736.2925 | 49439.7     | 0.783505816 | 0.134577776 |
| <i>Tpi1</i>  | 1489.9375  | 1613.567    | 0.923381242 | 0.544685407 |

## TCA cycle

| Gene Symbol   | Average value<br>(test: <i>Gck</i> <sup>+/-</sup> <i>db/db</i> ) | Average value<br>(control: <i>Gck</i> <sup>+/+</sup> <i>db/db</i> ) | Ratio (test/control) | P-value     |
|---------------|------------------------------------------------------------------|---------------------------------------------------------------------|----------------------|-------------|
| <i>Aco2</i>   | 9566.4945                                                        | 7608.493333                                                         | 1.257344139          | 0.050458868 |
| <i>Cs</i>     | 2150.2025                                                        | 2154.475333                                                         | 0.998016764          | 0.915420695 |
| <i>Fh1</i>    | 3476.364                                                         | 2762.419667                                                         | 1.258448903          | 0.187306047 |
| <i>Idh2</i>   | 1524.70775                                                       | 1235.638667                                                         | 1.233943054          | 0.064801205 |
| <i>Idh3a</i>  | 2476.54175                                                       | 2595.194                                                            | 0.954280008          | 0.554219508 |
| <i>Idh3b</i>  | 3525.8995                                                        | 3907.359333                                                         | 0.902374007          | 0.179837722 |
| <i>Idh3g</i>  | 16949.6                                                          | 14107.44                                                            | 1.201465326          | 0.01602424  |
| <i>Mdh2</i>   | 6945.502                                                         | 6638.983333                                                         | 1.046169519          | 0.586226525 |
| <i>Ogdh</i>   | 14328.25                                                         | 13672.56                                                            | 1.047956637          | 0.63161217  |
| <i>Pdha1</i>  | 1242.34675                                                       | 1517.750333                                                         | 0.81854487           | 0.142364434 |
| <i>Pdhb</i>   | 21547.2475                                                       | 20684.48333                                                         | 1.041710695          | 0.838462558 |
| <i>Pdk1</i>   | 1323.19025                                                       | 2059.256                                                            | 0.642557433          | 0.001545921 |
| <i>Pdk2</i>   | 1428.998                                                         | 1155.464967                                                         | 1.236729837          | 0.091458639 |
| <i>Pdk3</i>   | 180.6734                                                         | 188.3809                                                            | 0.959085555          | 0.669163039 |
| <i>Sdha</i>   | 353.49795                                                        | 356.5083                                                            | 0.991556017          | 0.998606274 |
| <i>Sdhb</i>   | 2411.06525                                                       | 2187.918                                                            | 1.101990682          | 0.79117887  |
| <i>Sdhc</i>   | 572.0353                                                         | 516.4596333                                                         | 1.107608926          | 0.155699615 |
| <i>Sucla2</i> | 16.6079225                                                       | 16.52249667                                                         | 1.005170274          | 0.987851187 |
| <i>Suclg1</i> | 2865.24925                                                       | 3266.435                                                            | 0.877179325          | 0.250446472 |
| <i>Suclg2</i> | 697.663225                                                       | 889.4768333                                                         | 0.784352328          | 0.04610927  |

**Supplementary Table 5.** The expression levels of genes involved in Ca<sup>2+</sup>-binding and signaling

| Gene Symbol    | Average value<br>(test: <i>Gck</i> <sup>+/-</sup> <i>db/db</i> ) | Average value<br>(control: <i>Gck</i> <sup>+/+</sup> <i>db/db</i> ) | Ratio (test/control) | P-value     |
|----------------|------------------------------------------------------------------|---------------------------------------------------------------------|----------------------|-------------|
| <i>Cacng3</i>  | 51.5395275                                                       | 48.10675                                                            | 1.071357502          | 0.502758452 |
| <i>Camk1d</i>  | 149.841125                                                       | 174.9702333                                                         | 0.856380666          | 0.529270752 |
| <i>Camkk1</i>  | 14.73177                                                         | 13.27643333                                                         | 1.109618045          | 0.704966906 |
| <i>Camkk2</i>  | 264.272325                                                       | 338.4388333                                                         | 0.780856979          | 0.25289089  |
| <i>Mef2c</i>   | 1455.98875                                                       | 3166.981                                                            | 0.459740286          | 0.047085674 |
| <i>Mef2d</i>   | 4337.2765                                                        | 4113.387333                                                         | 1.054429391          | 0.496301528 |
| <i>Myo7a</i>   | 996.428675                                                       | 1070.352033                                                         | 0.930935472          | 0.408752668 |
| <i>Nfatc1</i>  | 756.07745                                                        | 714.9829667                                                         | 1.057476171          | 0.993933252 |
| <i>Pcp4</i>    | 1747.633725                                                      | 705.7159667                                                         | 2.476398165          | 0.090937905 |
| <i>S100a1</i>  | 204.525575                                                       | 302.3089                                                            | 0.676545001          | 0.128835443 |
| <i>S100a13</i> | 122.213825                                                       | 152.0565333                                                         | 0.803739388          | 0.07854115  |
| <i>S100a3</i>  | 12.4460725                                                       | 11.29136333                                                         | 1.102264814          | 0.326490352 |
| <i>S100a4</i>  | 106.453875                                                       | 142.8068333                                                         | 0.745439644          | 0.050122917 |
| <i>S100a6</i>  | 23.2272925                                                       | 84.45539                                                            | 0.275024395          | 0.004501011 |

## Supplementary figure legends

### Supplementary Fig. 1. Effects of glucokinase haploinsufficiency on changes in body weight and blood glucose levels.

**A, B** Area under the curve for the changes in **(A)** body weight and **(B)** fed blood glucose levels after 10 weeks of age in the  $Gck^{+/+}db/+$ ,  $Gck^{+/-}db/+$ ,  $Gck^{+/+}db/db$ , and  $Gck^{+/-}db/db$  mice ( $n = 14-18$ ). Values are means  $\pm$  SD.  $P$  values were determined using analysis of variance (ANOVA) followed by *post-hoc* Bonferroni's test. \*\*  $P < 0.01$ .

### Supplementary Fig. 2. Effects of glucokinase haploinsufficiency on metabolic changes.

**A** Food intake in the  $Gck^{+/+}db/db$  and  $Gck^{+/-}db/db$  mice aged 23 weeks ( $n = 4$ ). **B** Blood glucose levels during the intraperitoneal insulin tolerance test in the  $Gck^{+/+}db/db$  and  $Gck^{+/-}db/db$  mice aged 18 weeks ( $n = 7-13$ ). **C** Fasting plasma triglyceride level in the  $Gck^{+/+}db/db$  and  $Gck^{+/-}db/db$  mice aged 23 weeks ( $n = 6$ ). **D** Fasting plasma non-esterified fatty acid level in the  $Gck^{+/+}db/db$  and  $Gck^{+/-}db/db$  mice aged 23 weeks ( $n = 6$ ). **E** Plasma alanine aminotransferase level in the  $Gck^{+/+}db/db$  and  $Gck^{+/-}db/db$  mice aged 23 weeks ( $n = 6$ ). Values are means  $\pm$  SD.  $P$  values were determined using Student's  $t$  test.

### Supplementary Fig. 3. Effects of glucokinase haploinsufficiency on alpha-cells.

The ratio of the number of alpha-cells to the total number of alpha- plus beta-cells in the

*Gck*<sup>+/+</sup>*db/db* and *Gck*<sup>+/-</sup>*db/db* mice aged 10 weeks (*n* = 4–6). Values are means ± SD. *P* values were determined using Student's *t* test.

**Supplementary Fig. 4. Effects of glucokinase haploinsufficiency on glucose tolerance and beta-cell mass in *db/db* mice aged 10 weeks.**

**A** Blood glucose levels during the OGTT in the *Gck*<sup>+/+</sup>*db/db* and *Gck*<sup>+/-</sup>*db/db* mice after a 16-h fast (*n* = 11–12). **B** Quantitation of beta cell mass in the *Gck*<sup>+/+</sup>*db/db* and *Gck*<sup>+/-</sup>*db/db* mice (*n* = 7). Values are means ± SD. *P* values were determined using Student's *t* test.

**Supplementary Fig. 5. Effects of glucokinase haploinsufficiency on apoptosis and dedifferentiation in *db/db* mice aged 10 weeks.**

**A** Apoptosis rate of beta-cells assessed using the TUNEL assay in the *Gck*<sup>+/+</sup>*db/db* and *Gck*<sup>+/-</sup>*db/db* mice (*n* = 4–6). **B** Gene expression levels of *Neurog3* and *Aldh1a* in the *Gck*<sup>+/+</sup>*db/db* and *Gck*<sup>+/-</sup>*db/db* mice (*n* = 5–6). Values are means ± SD. *P* values were determined using Student's *t* test.

**Supplementary Fig. 6. Effects of glucokinase haploinsufficiency on apoptosis in *db/db* mice aged 24 weeks.**

Apoptosis rate of beta-cells assessed using the TUNEL assay in the *Gck*<sup>+/+</sup>*db/db* and

*Gck*<sup>+/-</sup>*db/db* mice (*n* = 6). Values are means ± SD. *P* values were determined using Student's *t* test.

**Supplementary Fig. 7. Effects of glucokinase haploinsufficiency on fibrosis.**

Azan staining of pancreatic islets from the four groups; *Gck*<sup>+/+</sup>*db/+*, *Gck*<sup>+/-</sup>*db/+*, *Gck*<sup>+/+</sup>*db/db*, and *Gck*<sup>+/-</sup>*db/db* mice aged 24 weeks. Yellow scale bars represent 50 µm.

**Supplementary Fig. 8. Effects of glucokinase haploinsufficiency on transcription factors by immunofluorescent staining.**

**A, B** Quantitation of (A) MafA, (B) Nkx6.1 and insulin double-positive cells relative to insulin-positive cells (%) in the *Gck*<sup>+/+</sup>*db/+*, *Gck*<sup>+/-</sup>*db/+*, *Gck*<sup>+/+</sup>*db/db*, and *Gck*<sup>+/-</sup>*db/db* mice aged 10 weeks (*n* = 4–6). Values are means ± SD.

**Supplementary Fig. 9. Effects of glucokinase haploinsufficiency on protein levels of transcription factors.**

**A, B** Western blot for (A) MafA and (B) Nkx6.1 in the islets of the *Gck*<sup>+/+</sup>*db/db* and *Gck*<sup>+/-</sup>*db/db* mice aged 10 weeks.

**Supplementary Fig. 10. Changes in body weight, blood glucose levels and beta-cell mass.**



**A–C** (**A**) body weight, (**B**) blood glucose levels and (**C**) beta-cell mass in the  $Gck^{+/+}db/+$ ,  $Gck^{+/-}db/+$ ,  $Gck^{+/+}db/db$ , and  $Gck^{+/-}db/db$  mice aged 5, 10, and 24 weeks. Values are means  $\pm$  SD.

## **Supplementary methods**

*Western blot analysis.* The anti-MafA antibody was purchased from Bethyl Laboratories Inc. Montgomery, TX. The anti-Nkx6.1 antibody was purchased from Cell Signaling Technology Inc. Beverly, MA. Protein was prepared from more than 100 islets and 20 µg of protein samples were applied to the gel. Protein bands were visualized with ImmunoStar LD (FUJIFILM Wako Pure Chemical Corporation, Japan).
